# Supplementary material for: Reactivity of functionalized indoles with rare-earth metal amides. Synthesis, characterization and catalytic activity of rare-earth metal complexes incorporating indolyl ligands
Source: Royal Society of Chemistry journal article supplement (doi:10.1039/c5dt03214h), 2015-01-01
Supplement: c5dt03214h1.pdf [file c5dt03214h1.pdf]

**Electronic Supplementary Information for:**

**Reactivity of functionalized indoles with rare-earth metal amides. Synthesis,  
characterization and catalytic activity of rare-earth metal complexes  
incorporating indolyl ligands**

Zhijun Feng,<sup>a,c</sup> Yun Wei,<sup>a</sup> Shuangliu Zhou,<sup>a</sup> Guangchao Zhang,<sup>a</sup> Xiancui Zhu,<sup>a</sup>  
Liping Guo,<sup>a</sup> Shaowu Wang,<sup>\*a,b</sup> and Xiaolong Mu<sup>a</sup>

<sup>a</sup> Key Laboratory of Functional Molecular Solids, Ministry of Education, Anhui  
Laboratory of Molecule-Based Materials, College of Chemistry and Materials  
Science, Anhui Normal University, Wuhu, Anhui 241000, China.

<sup>b</sup> State Key Laboratory of Organometallic Chemistry, Shanghai Institute of Organic  
Chemistry, Shanghai 200032, China.

<sup>c</sup> Department of Chemistry, Wannan Medical College, Wuhu, Anhui 241002, China.

**Table of Contents**

|                                                                                                           |            |
|-----------------------------------------------------------------------------------------------------------|------------|
| <b>1. Characterization Spectra for Compound 1 and 2.....</b>                                              | <b>S2</b>  |
| <b>2. NMR Spectra of Complexes 8 and 11–14.....</b>                                                       | <b>S4</b>  |
| <b>3. NMR Spectra of aminoalkene substrates 15a–i.....</b>                                                | <b>S9</b>  |
| <b>4. <sup>1</sup>H NMR Monitoring of Hydroamination of 15a–i Using Complex 8.....</b>                    | <b>S18</b> |
| <b>5. NMR Spectra of Isolated 16a, 16c, 16e, 16g.....</b>                                                 | <b>S23</b> |
| <b>6. Molecular Structures and Selected Bond Distances and Angles of the<br/>Complexes 4–6, 8–14.....</b> | <b>S27</b> |
| <b>7. Crystallographic Data for 4–6, 8–<br/>14.....</b>                                                   | <b>S32</b> |

## Characterization Spectra for Compound 1 and 2.

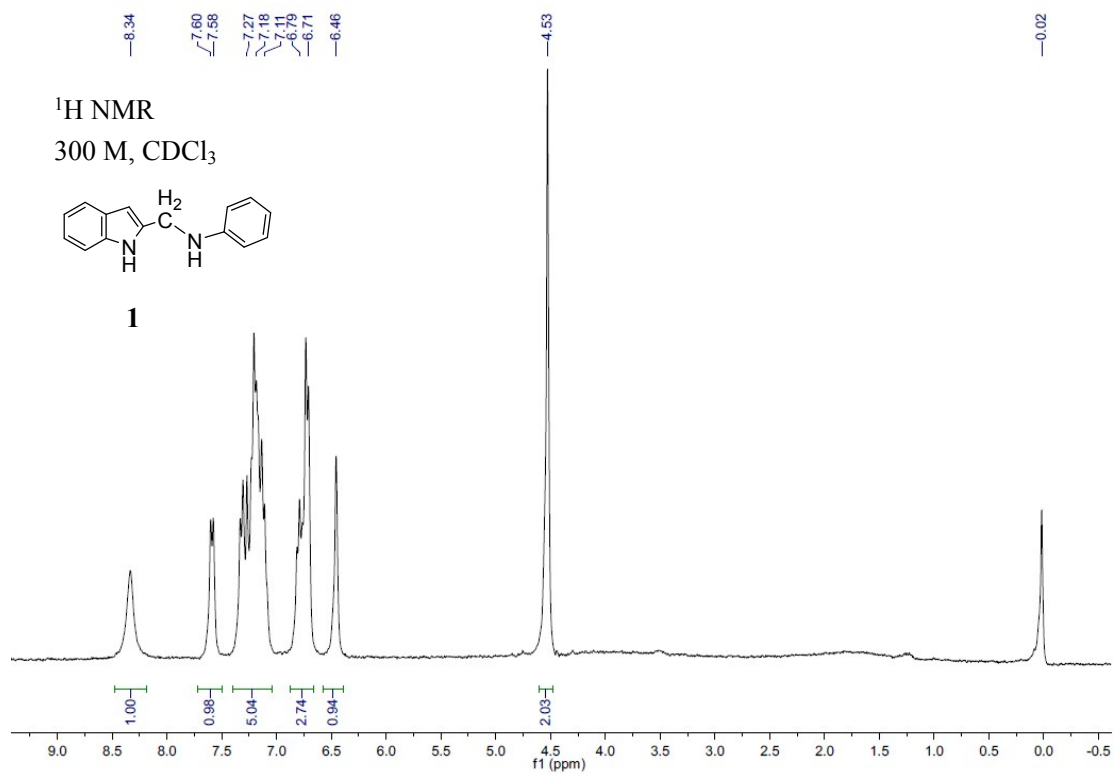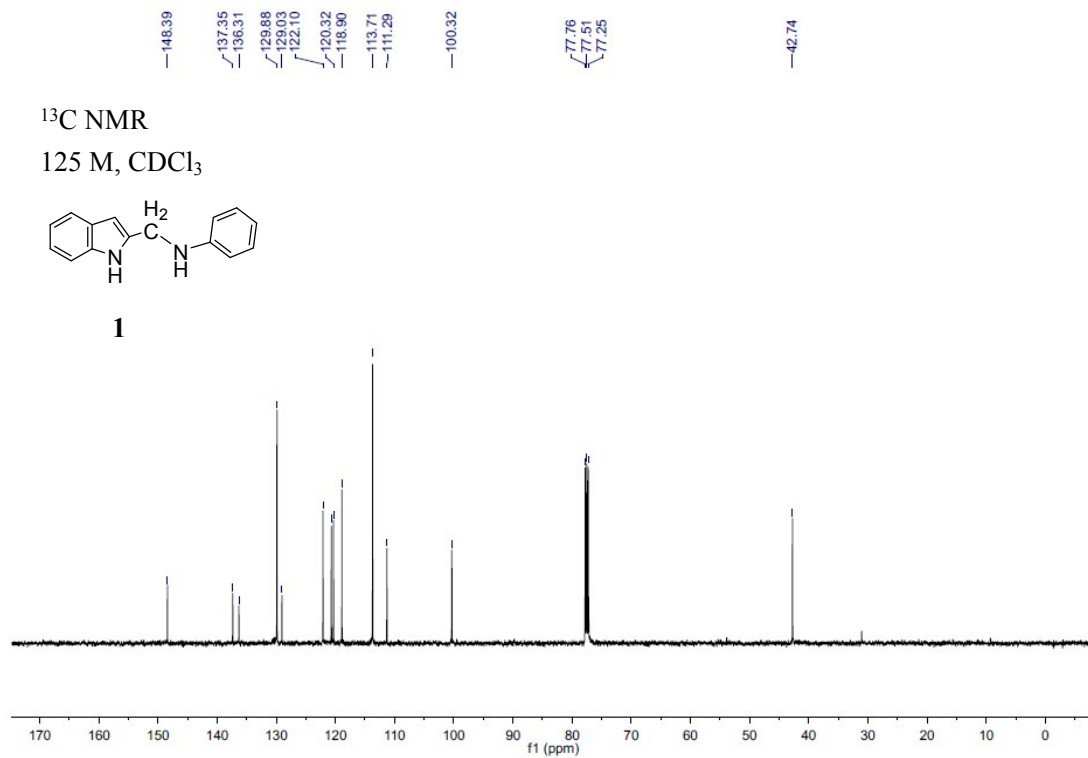

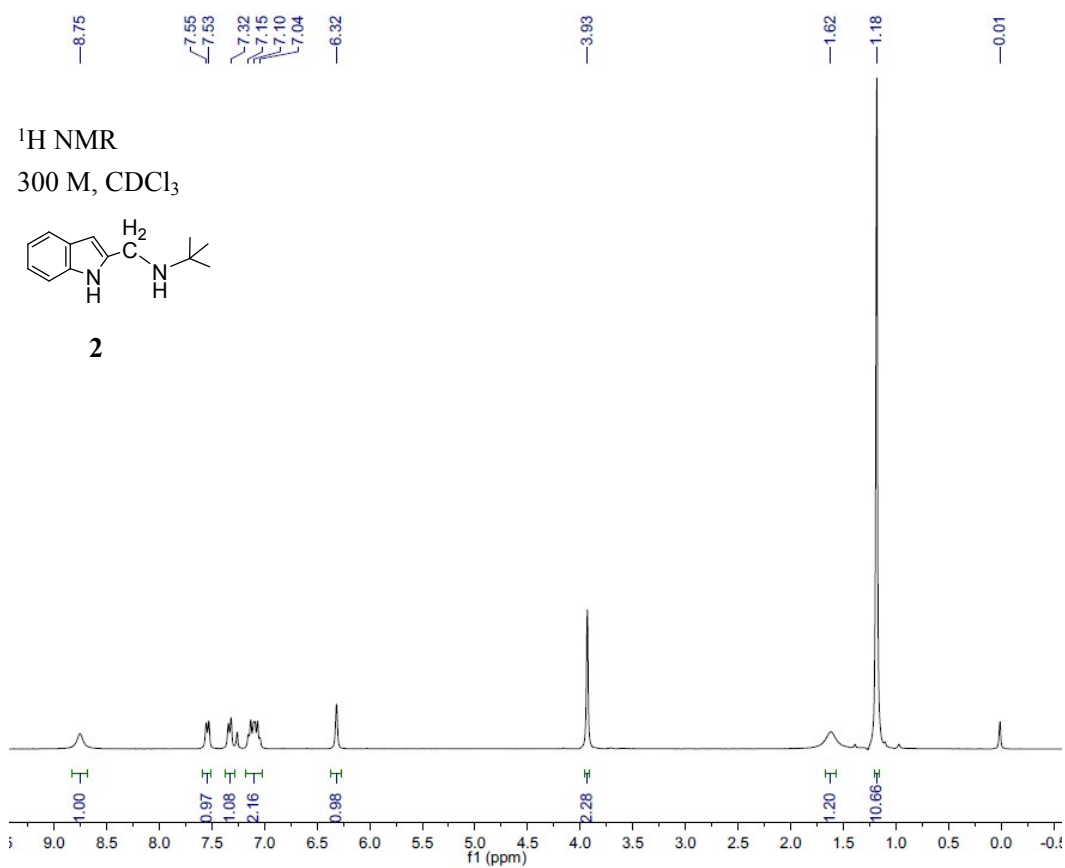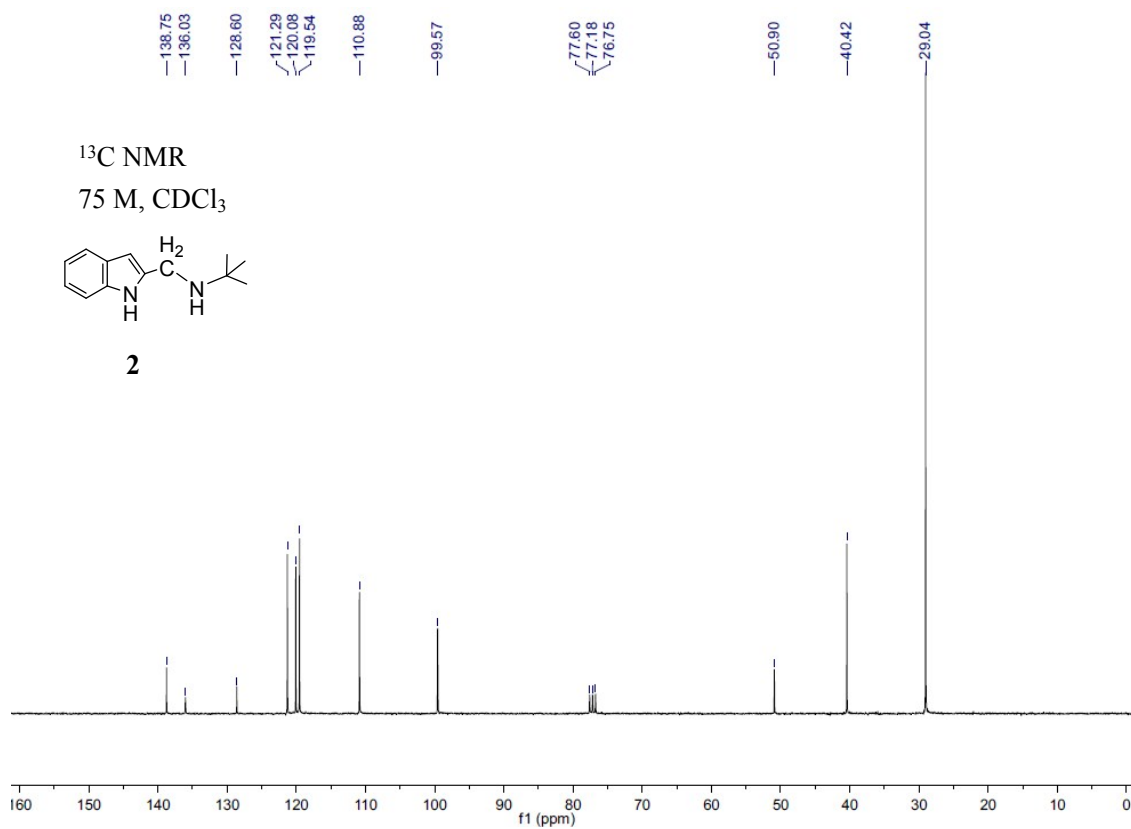

## NMR Spectra of Complexes 8 and 11–14.

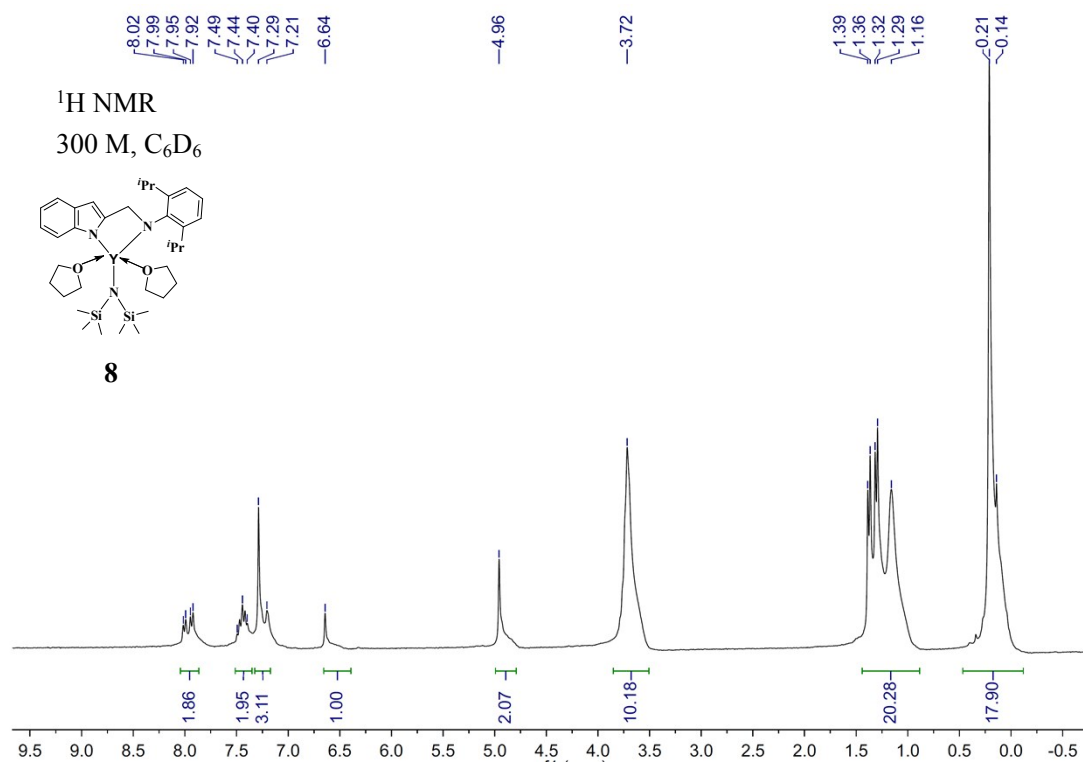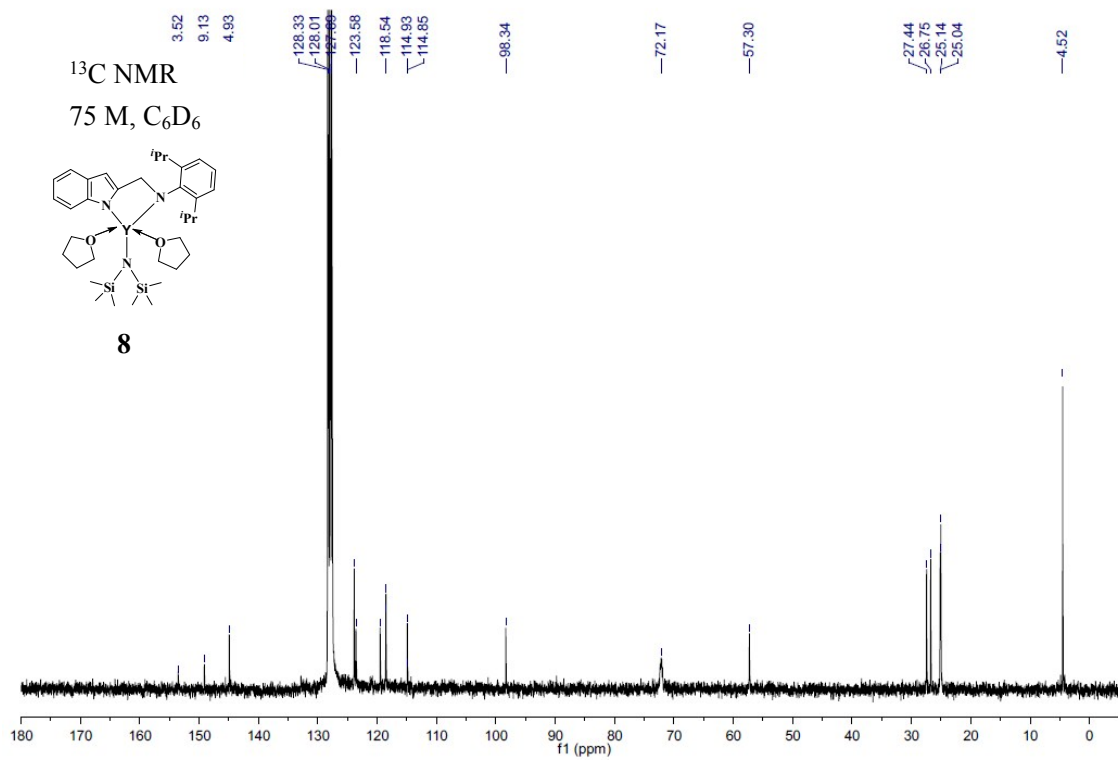

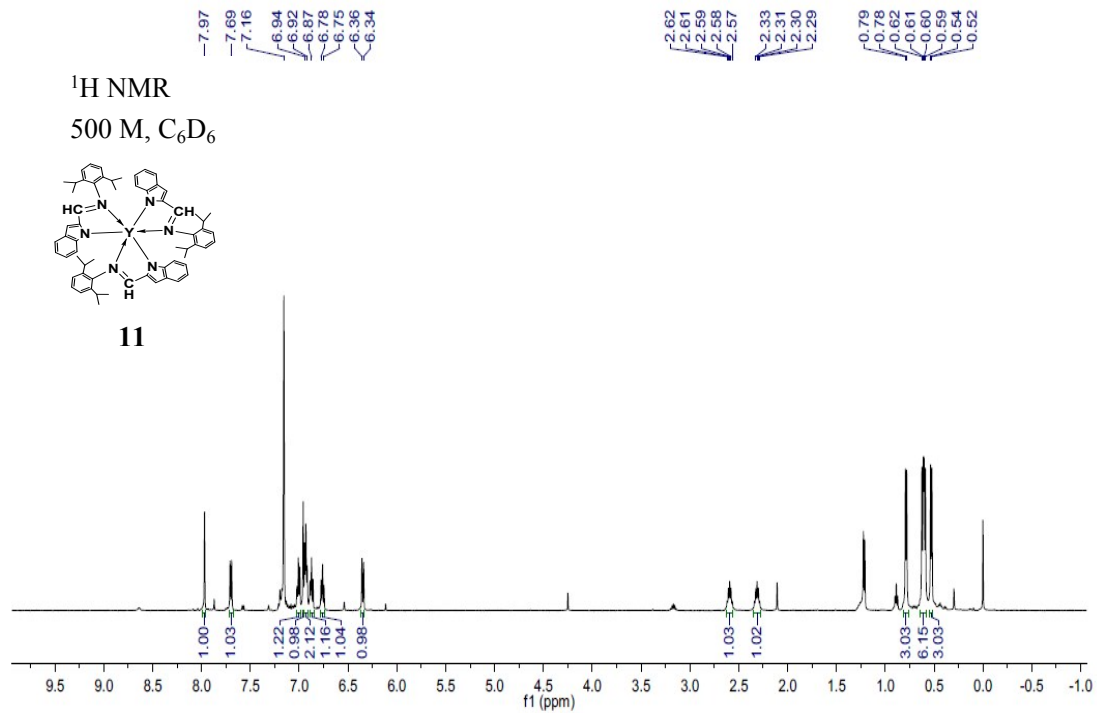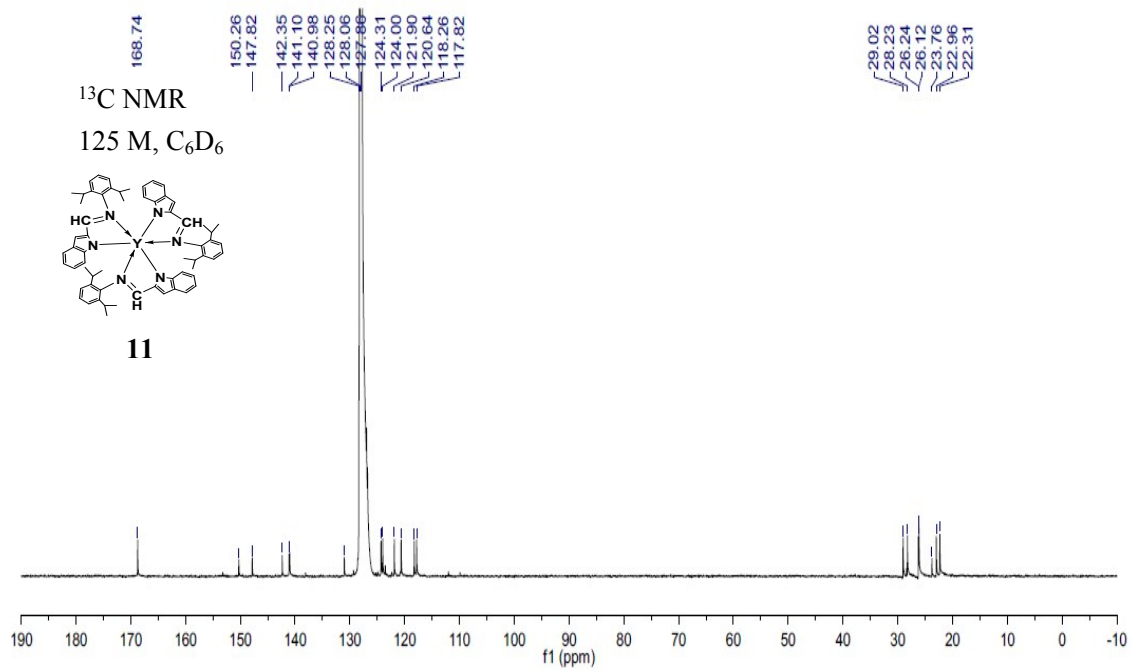

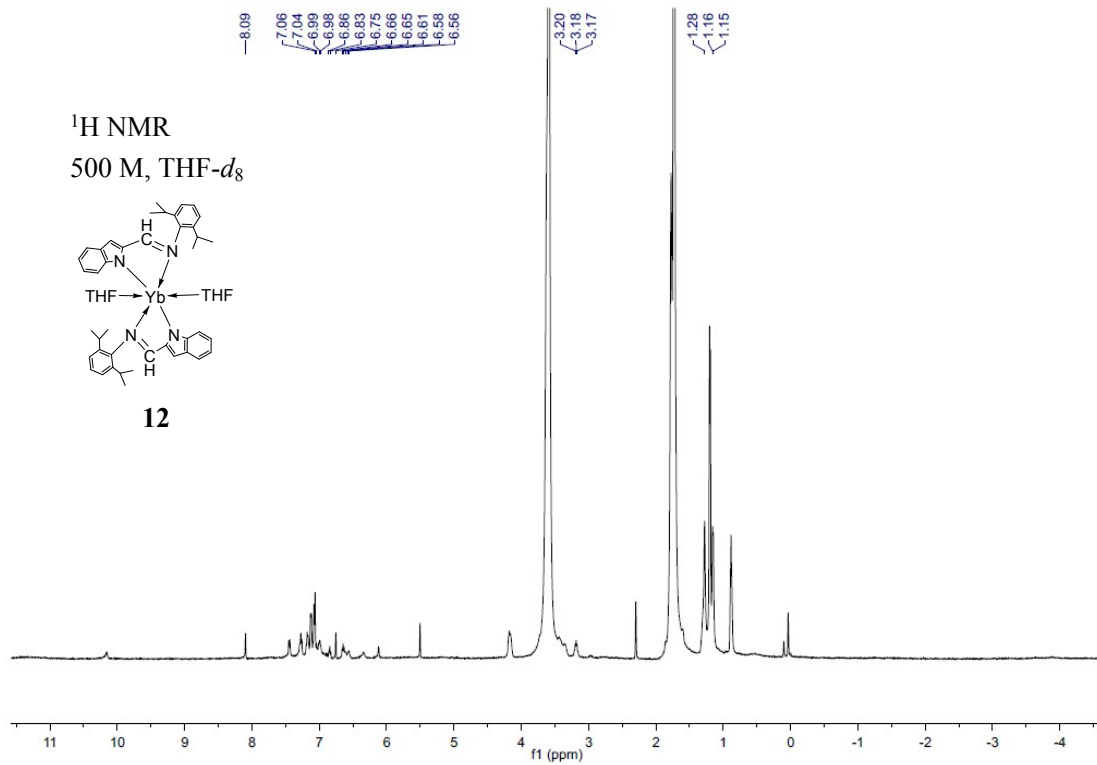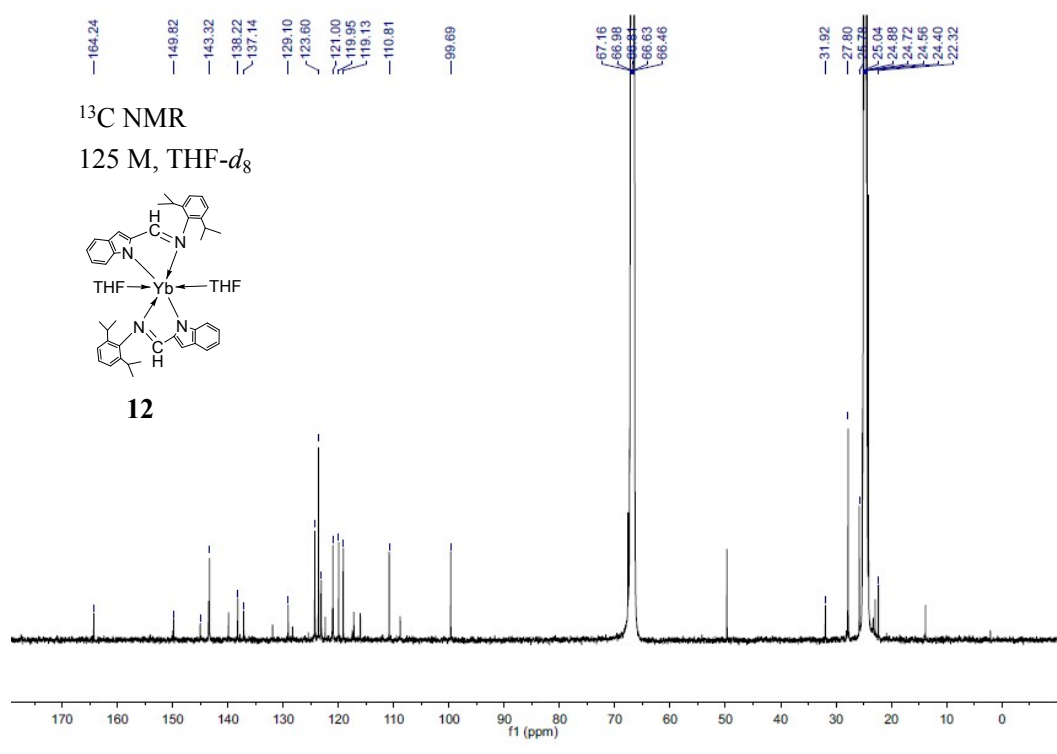

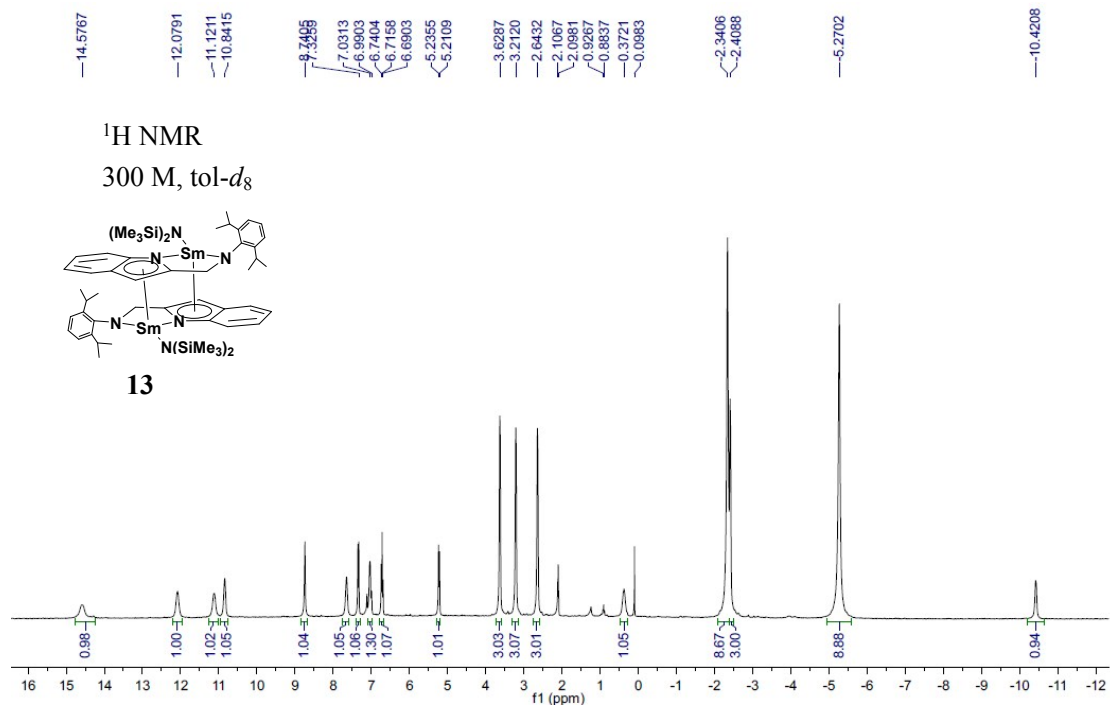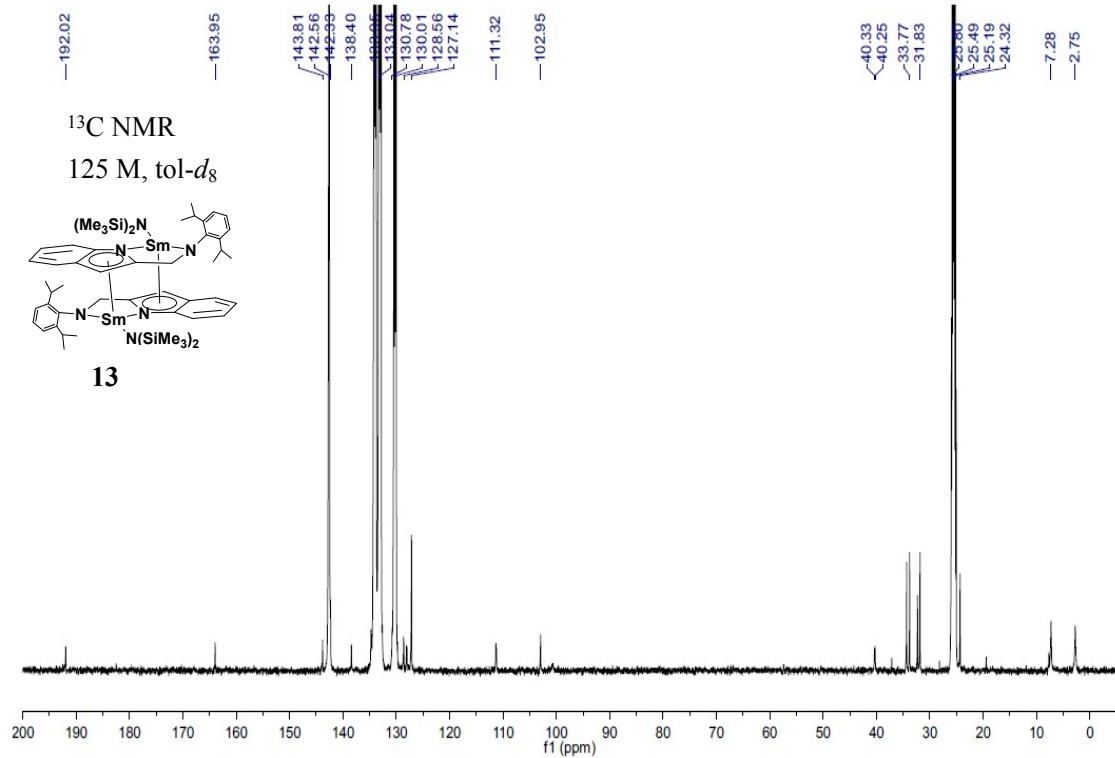

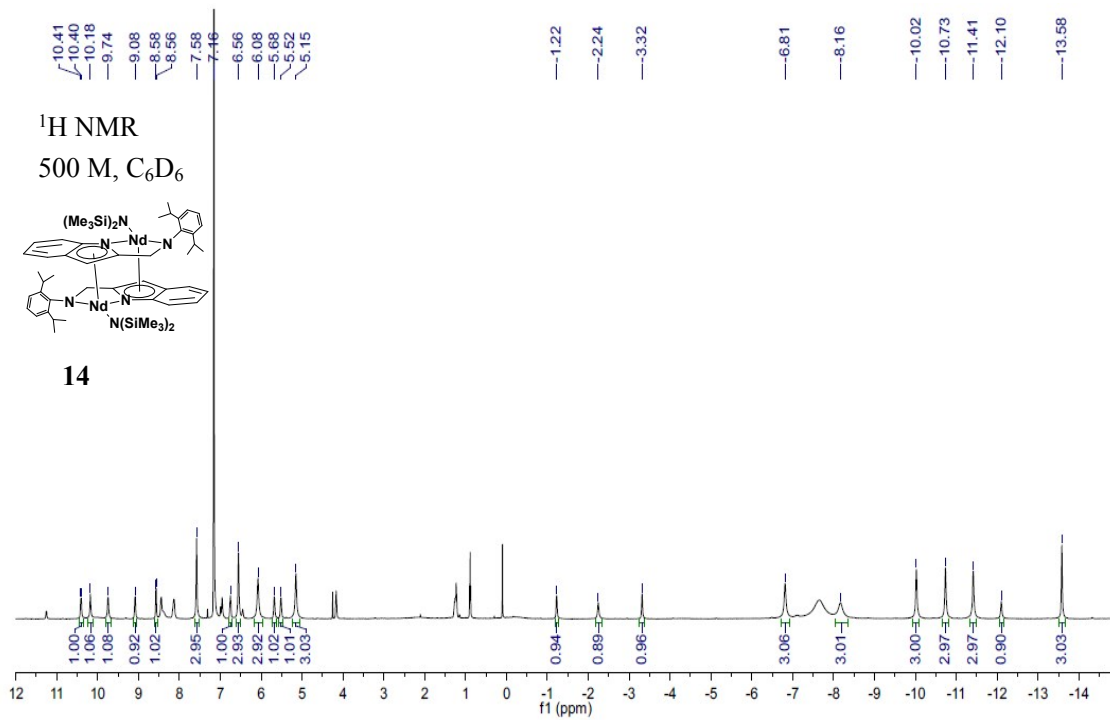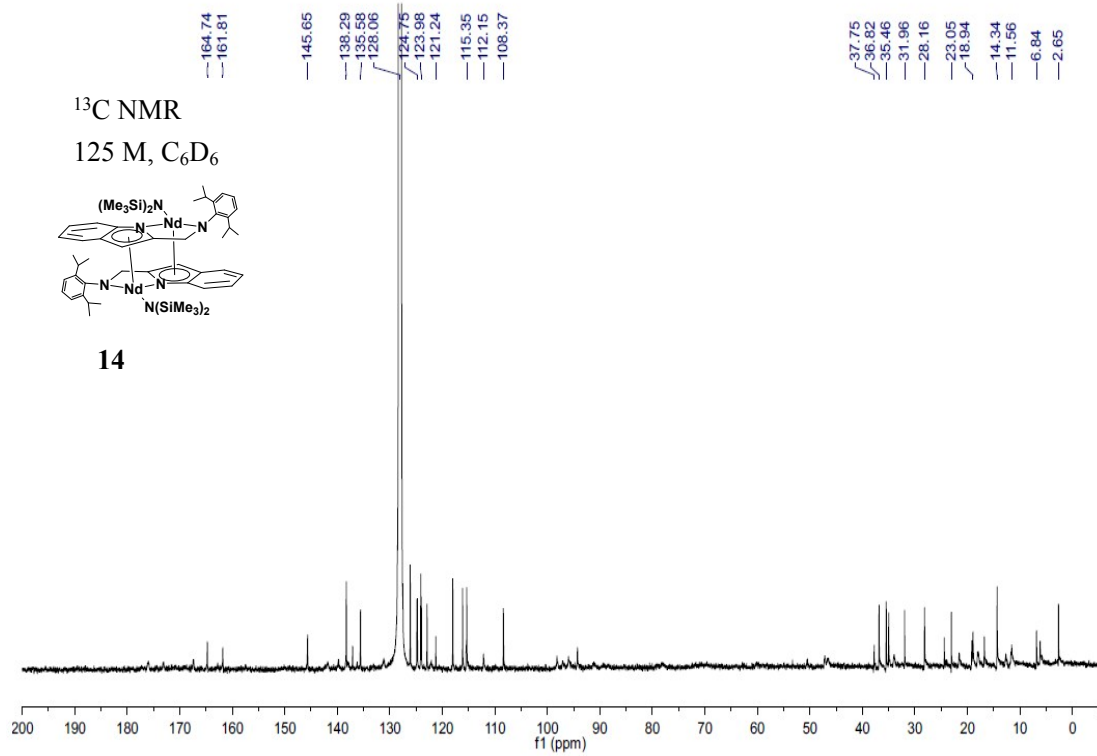



# NMR Spectra of Aminoalkene Substrates 15a-i.

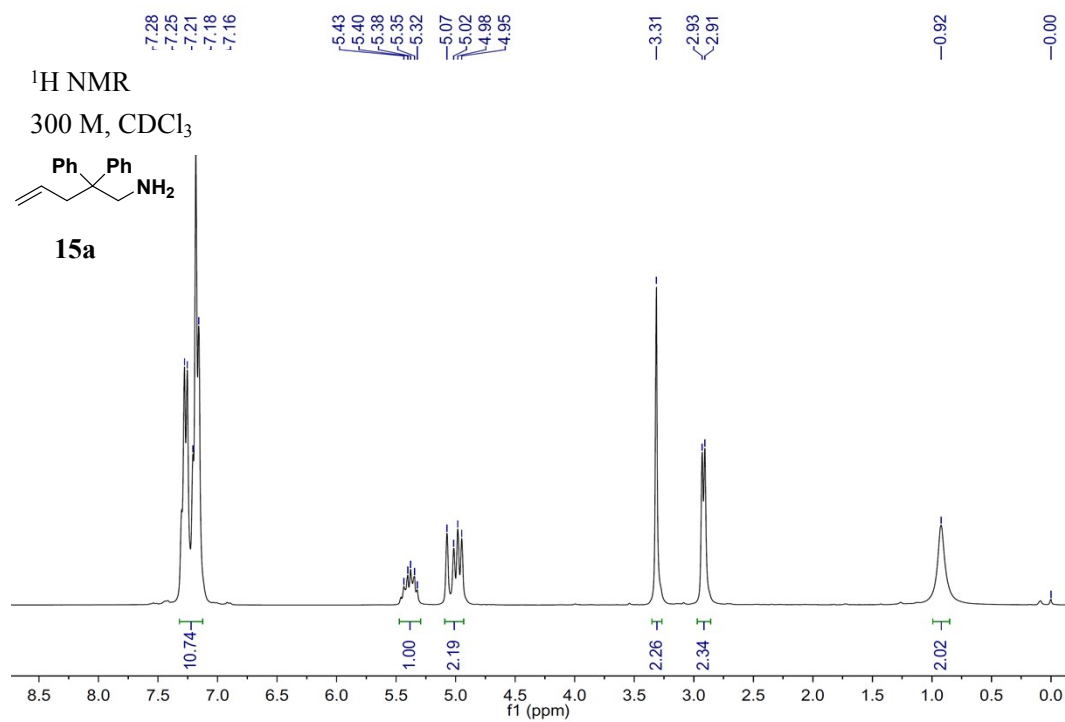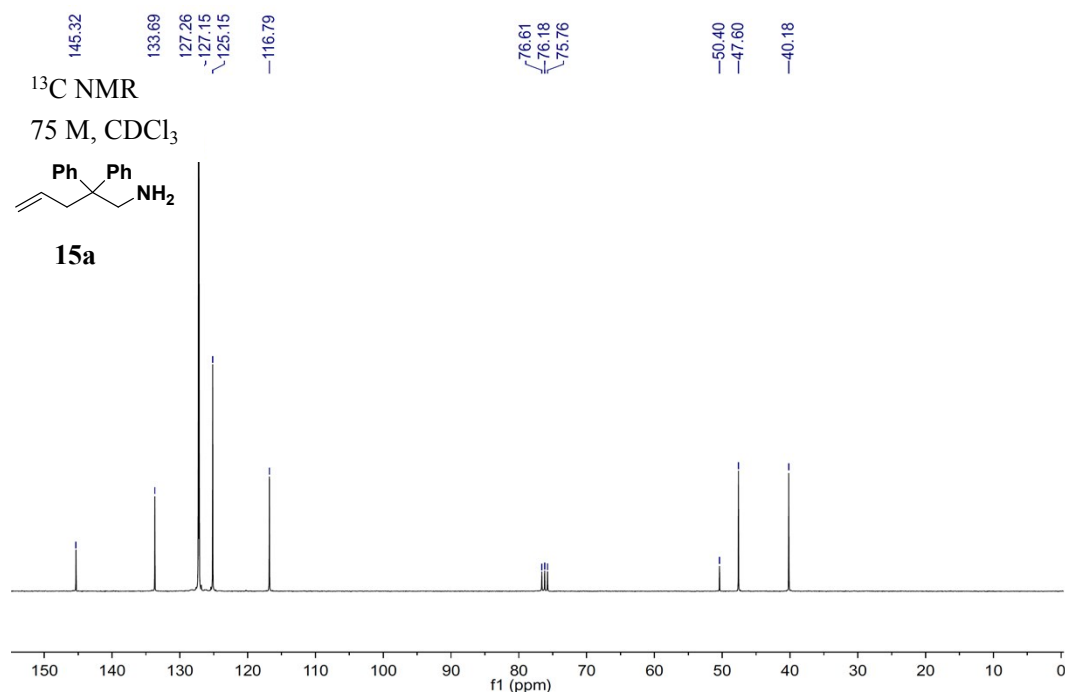

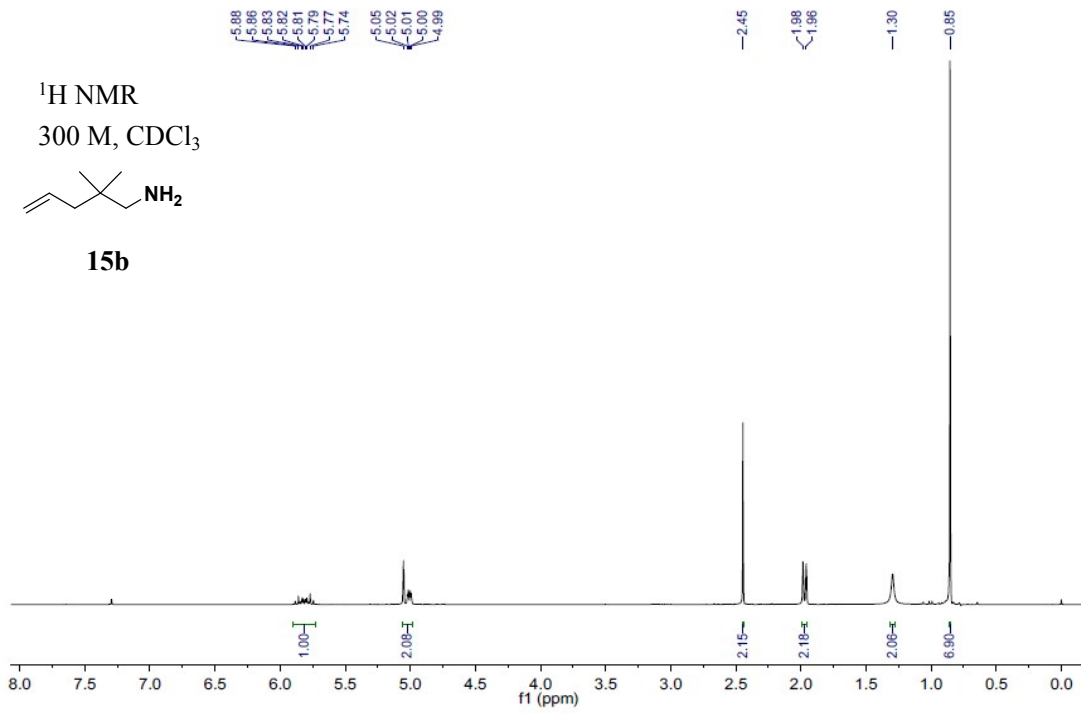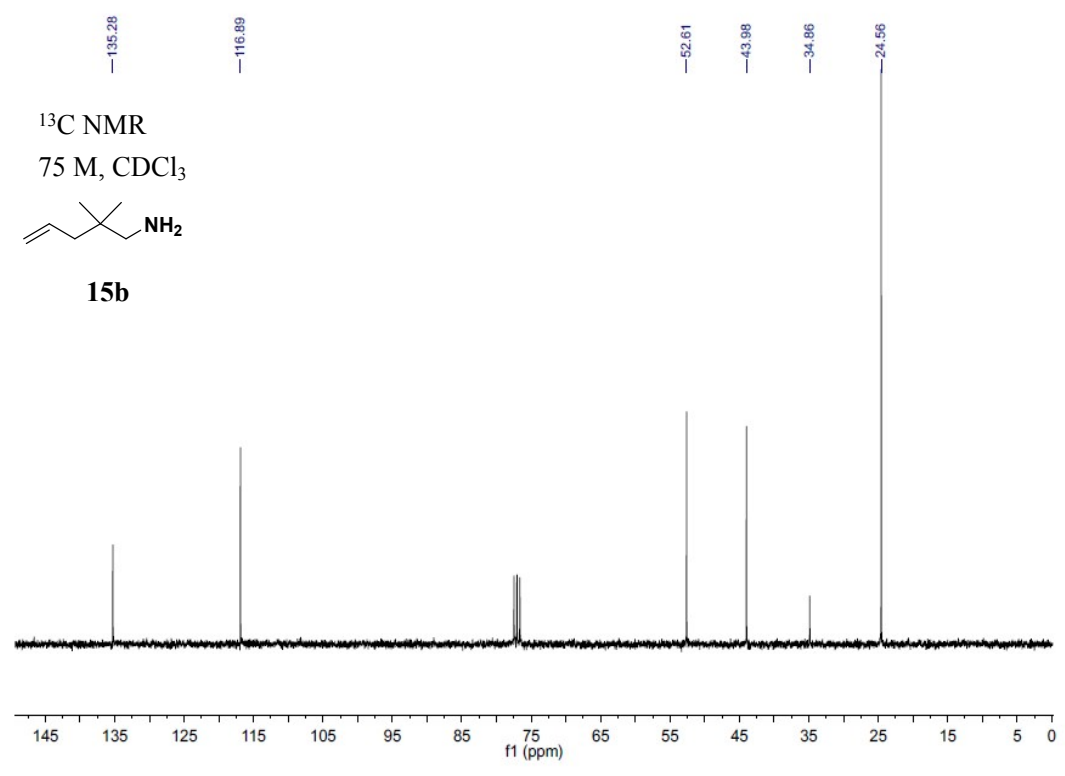

7.30  
7.27  
7.25  
7.19  
7.17

-4.82  
-4.59

-3.41

-2.92

-1.07

-0.00

<sup>1</sup>H NMR  
300 M, CDCl<sub>3</sub>

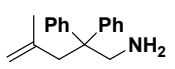

15c

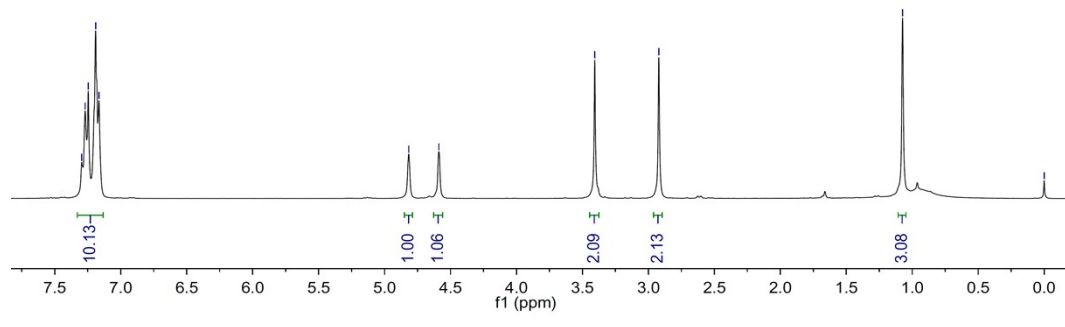

-146.93  
-142.85

-128.36  
-128.00  
-126.04

-115.24

-77.51  
-77.09  
-76.66

-51.27  
-47.84  
-43.99

-24.36

<sup>13</sup>C NMR  
75 M, CDCl<sub>3</sub>

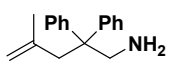

15c

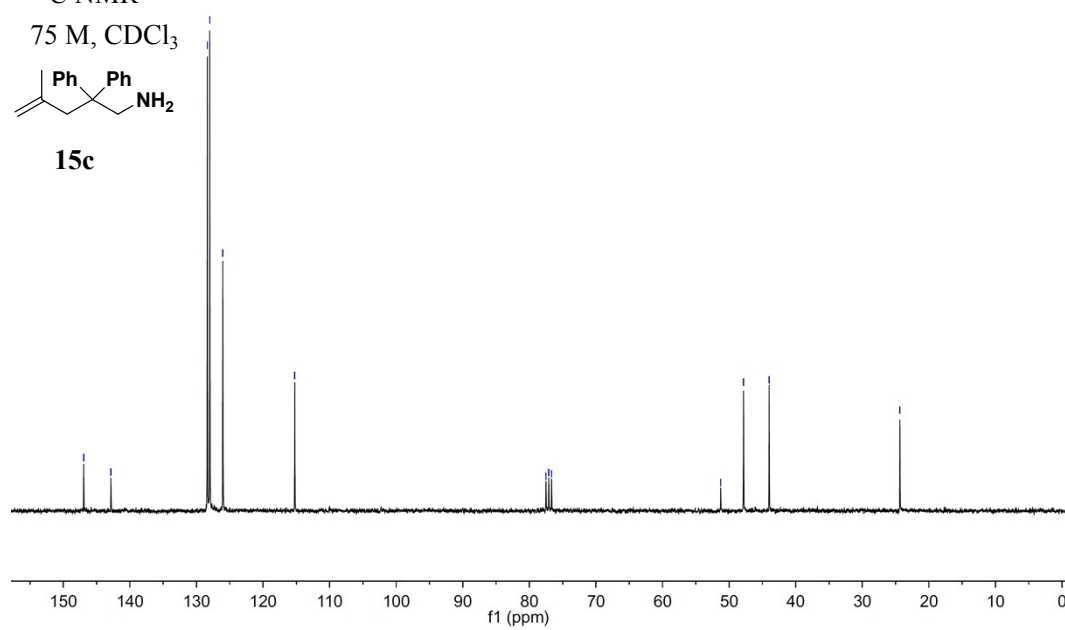

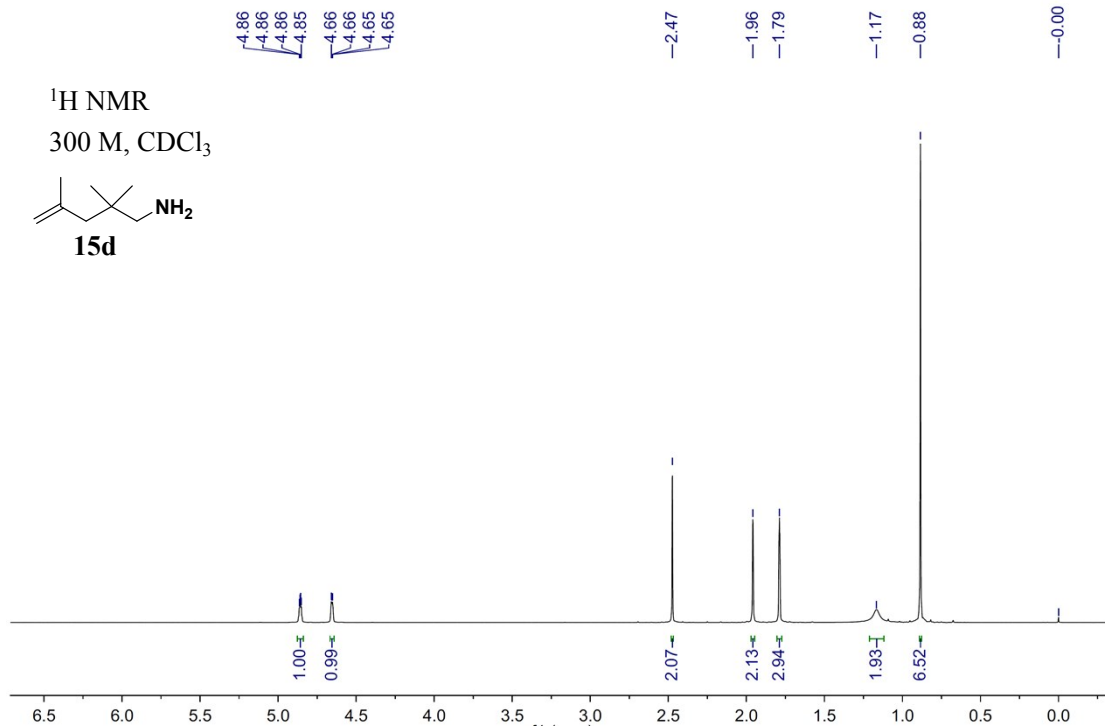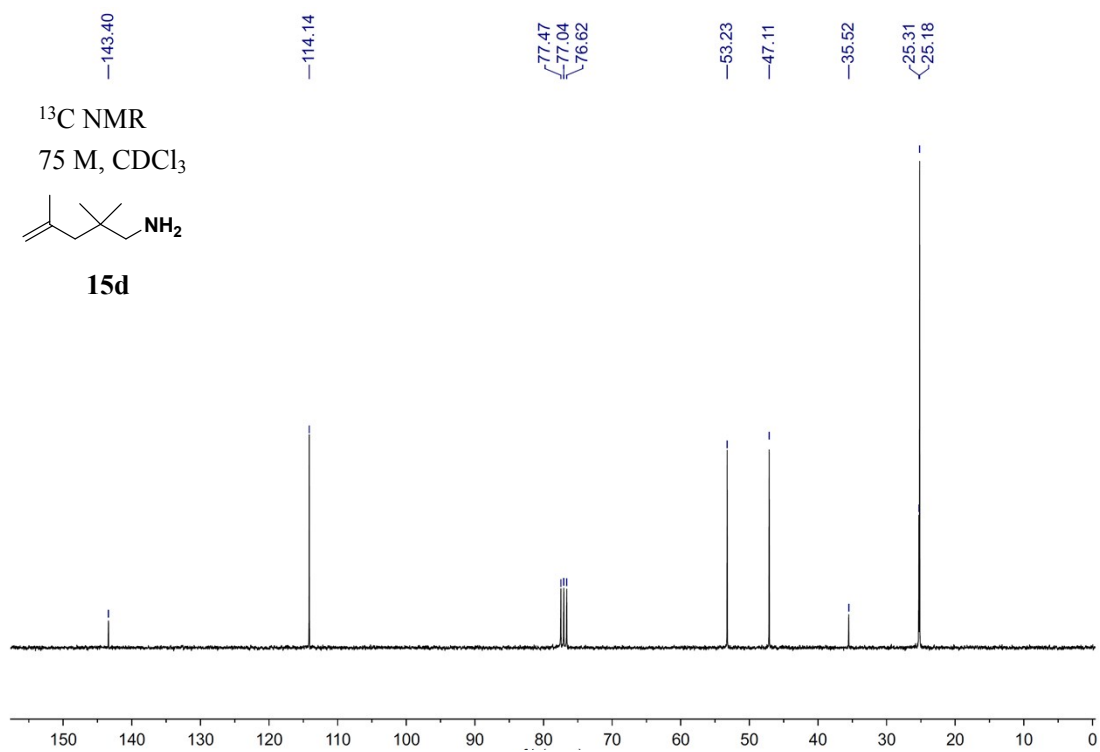

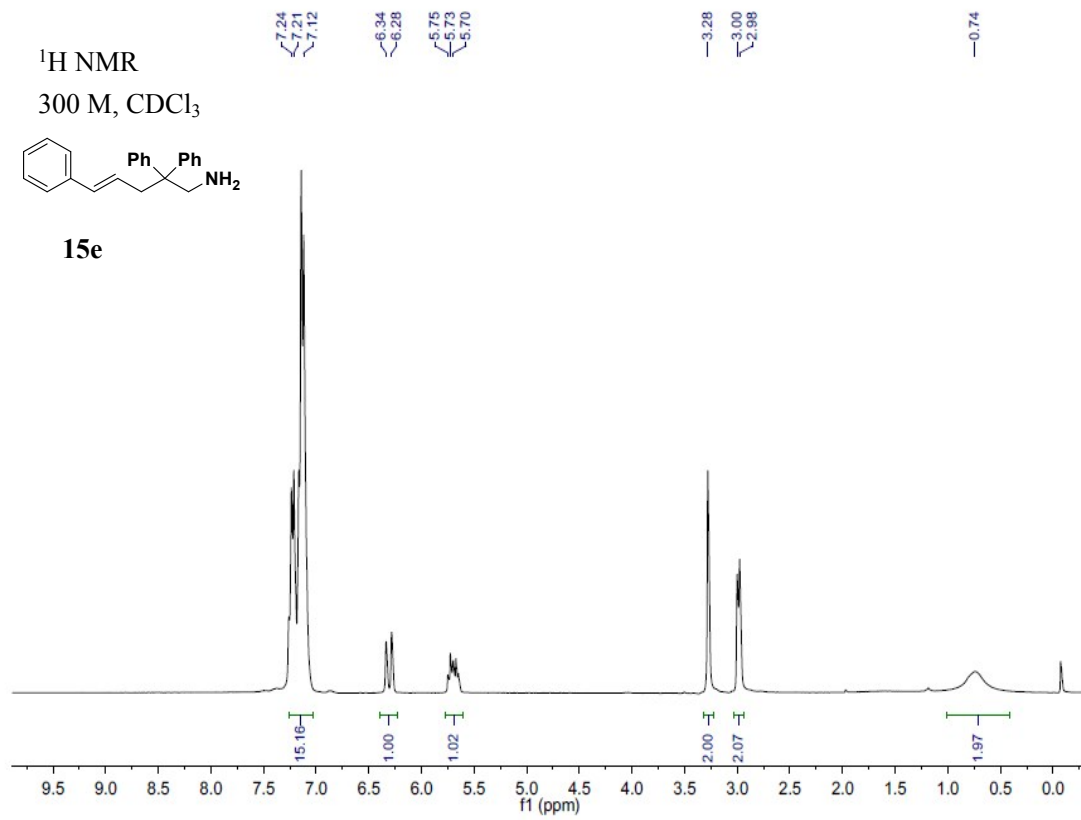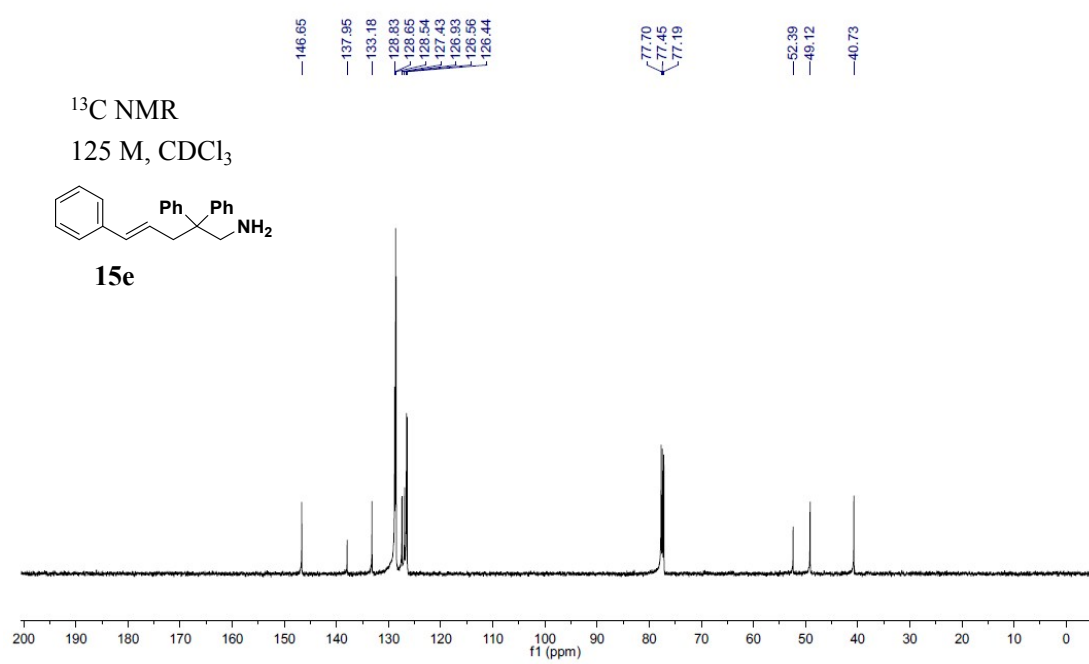

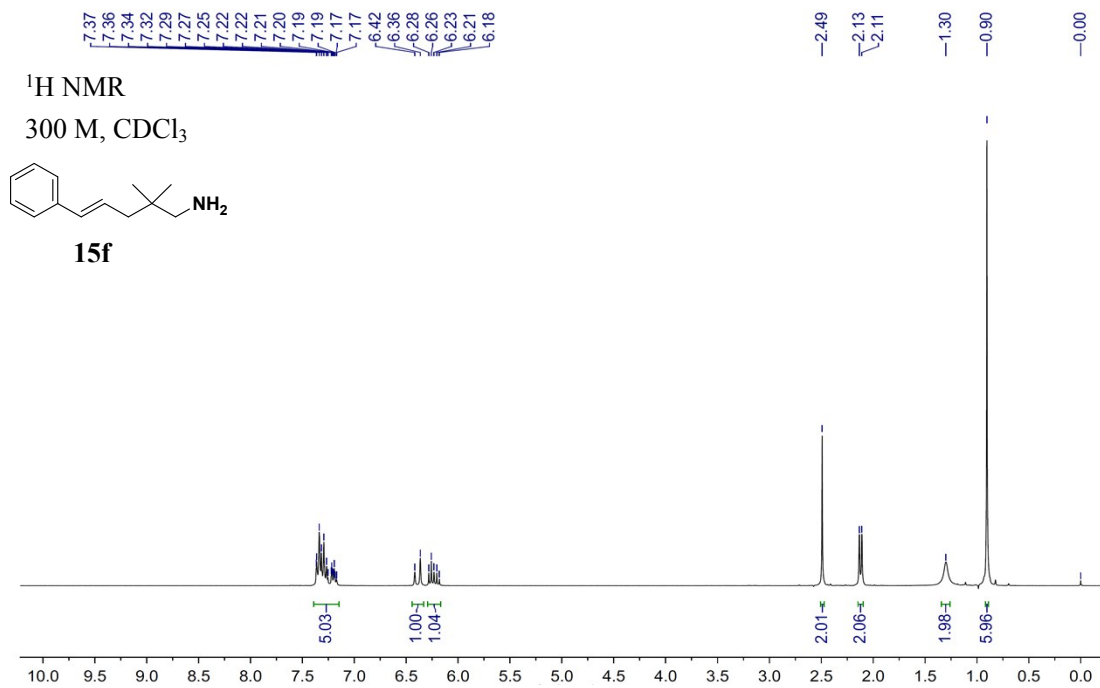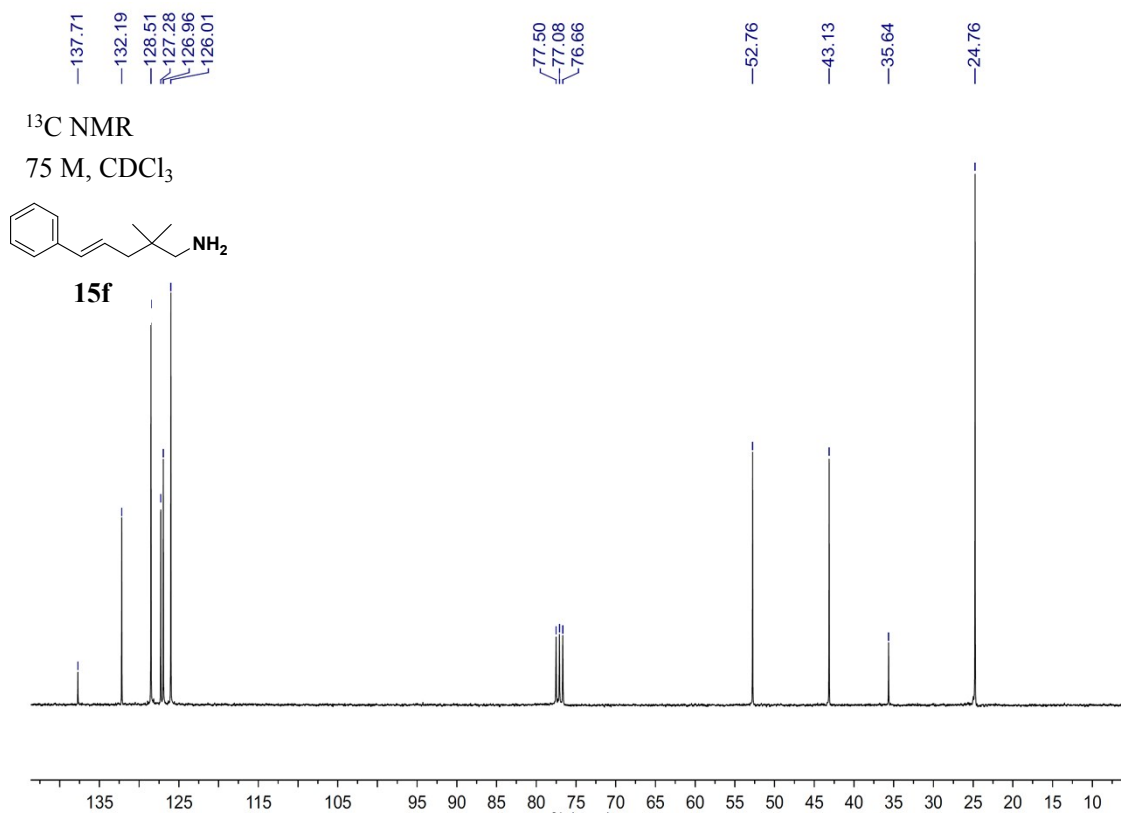

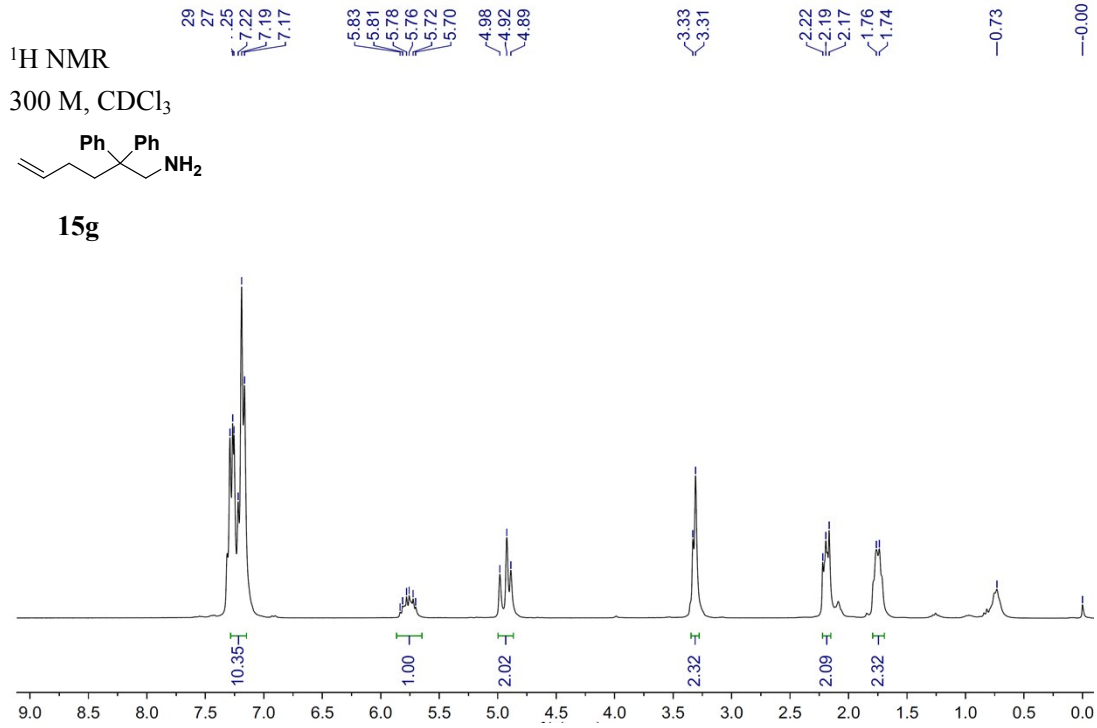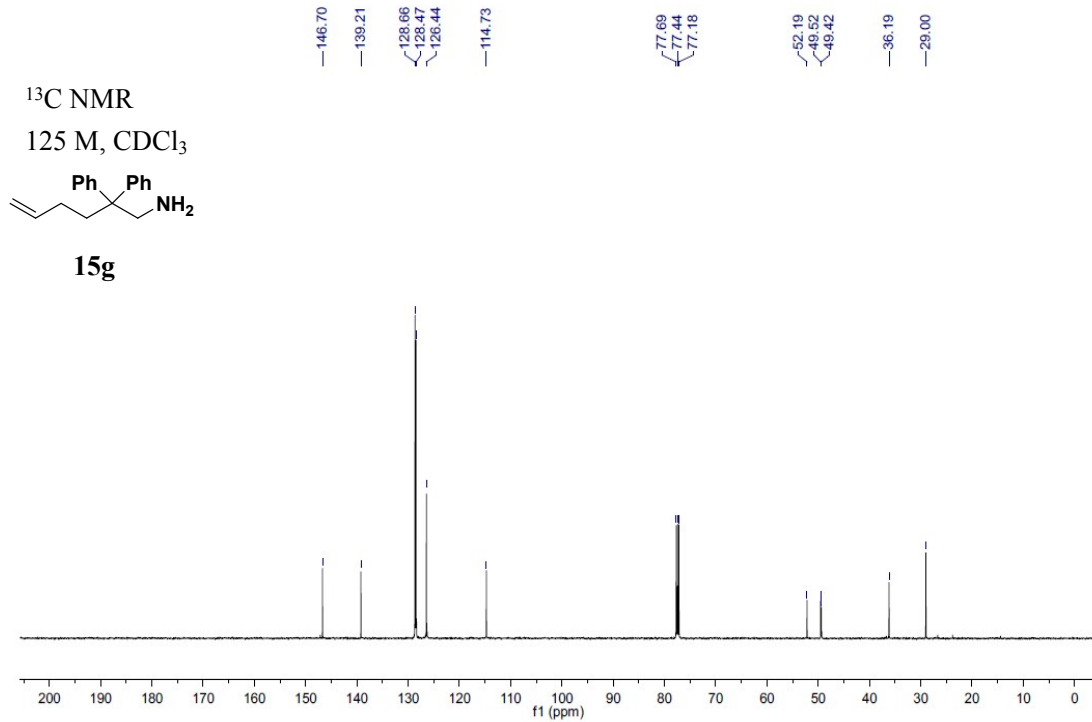

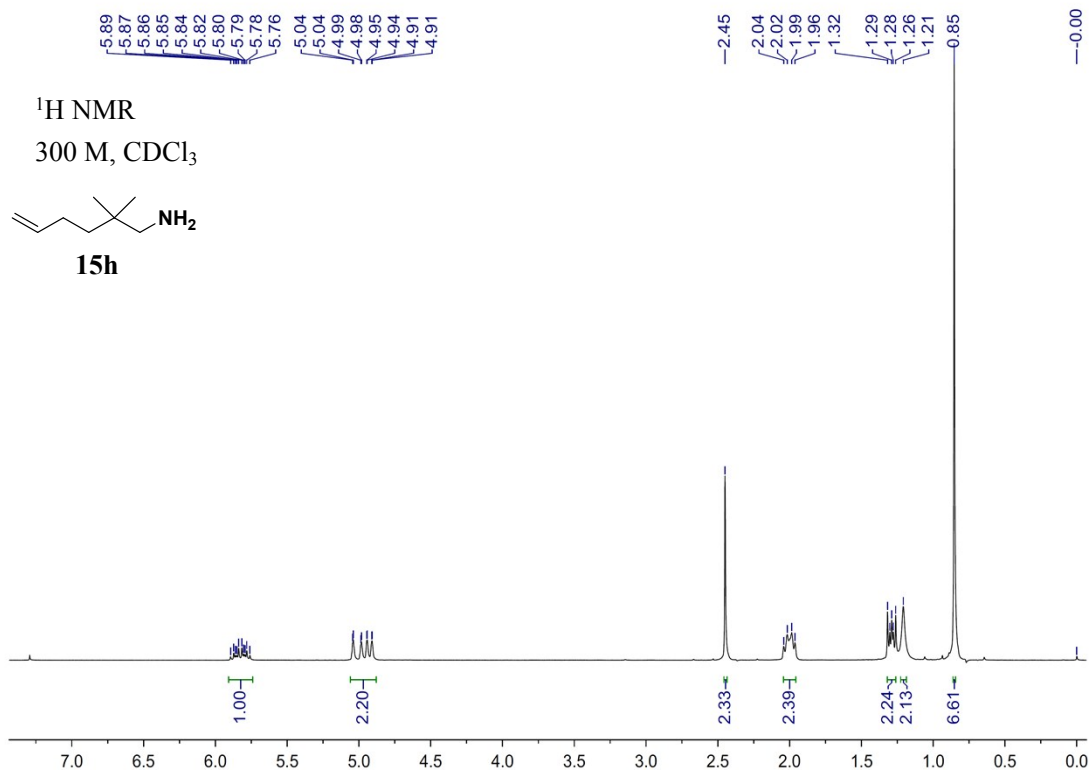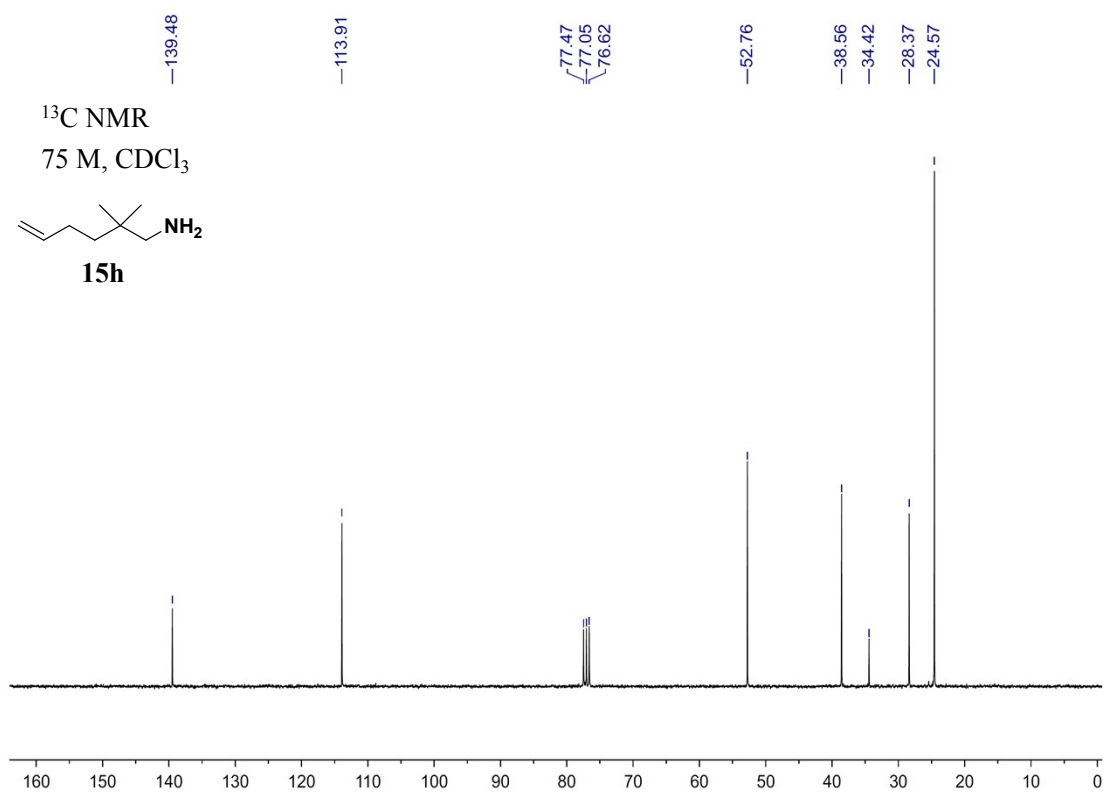



<sup>1</sup>H NMR  
300 M, CDCl<sub>3</sub>

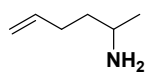

**15i**

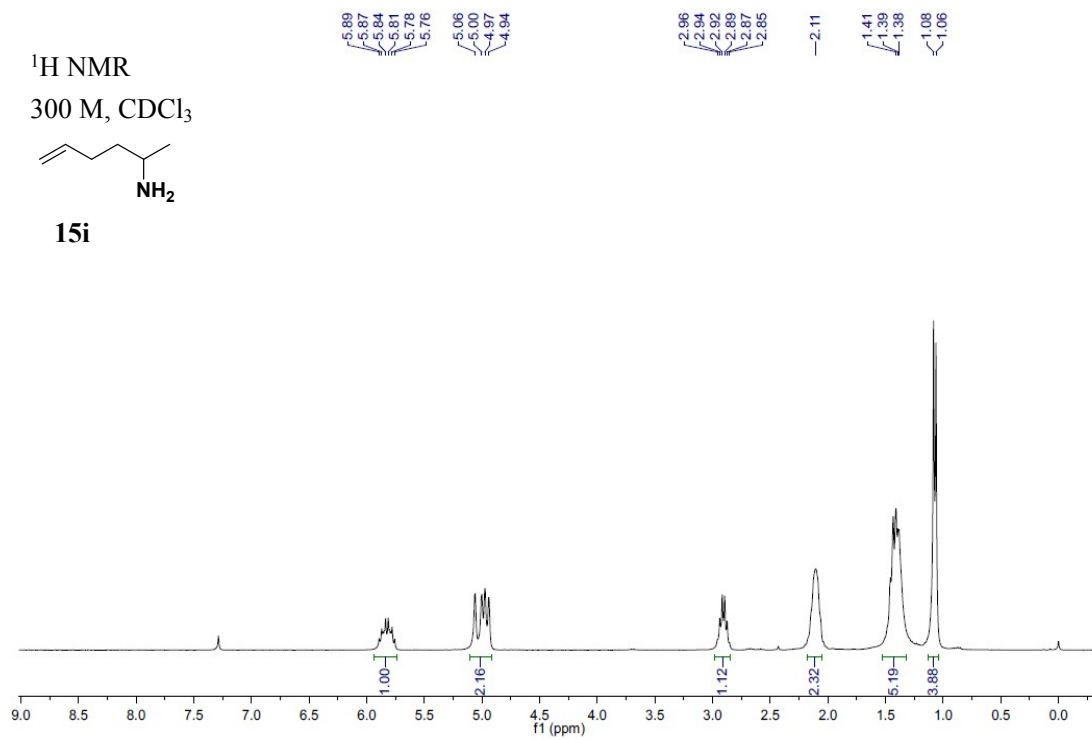

<sup>13</sup>C NMR  
75 M, CDCl<sub>3</sub>

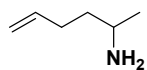

**15i**

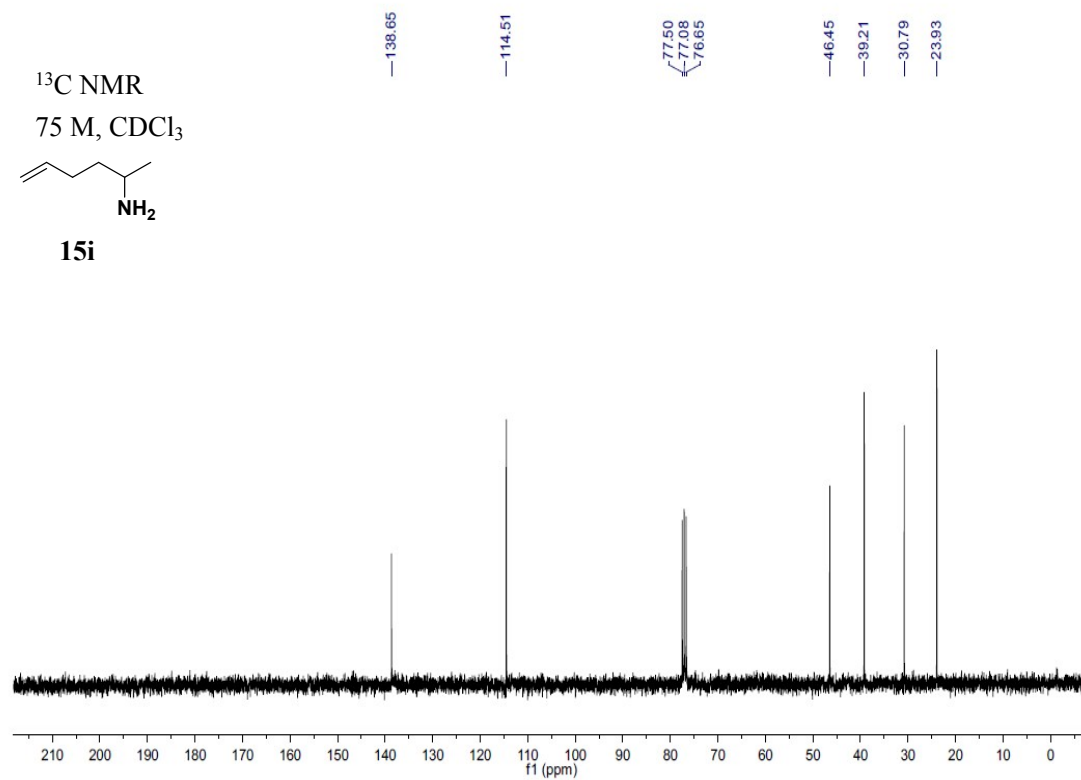

## <sup>1</sup>H NMR Monitoring of Hydroamination of 15a–i Using Complex 8.

Table 5, Entry 1 <sup>1</sup>H NMR, 300 M, C<sub>6</sub>D<sub>6</sub>, ferrocene as internal standard  
Substrate: 15a (0.32 mmol), Catalyst: 8 (2.0 % mol), Temperature: 25 °C

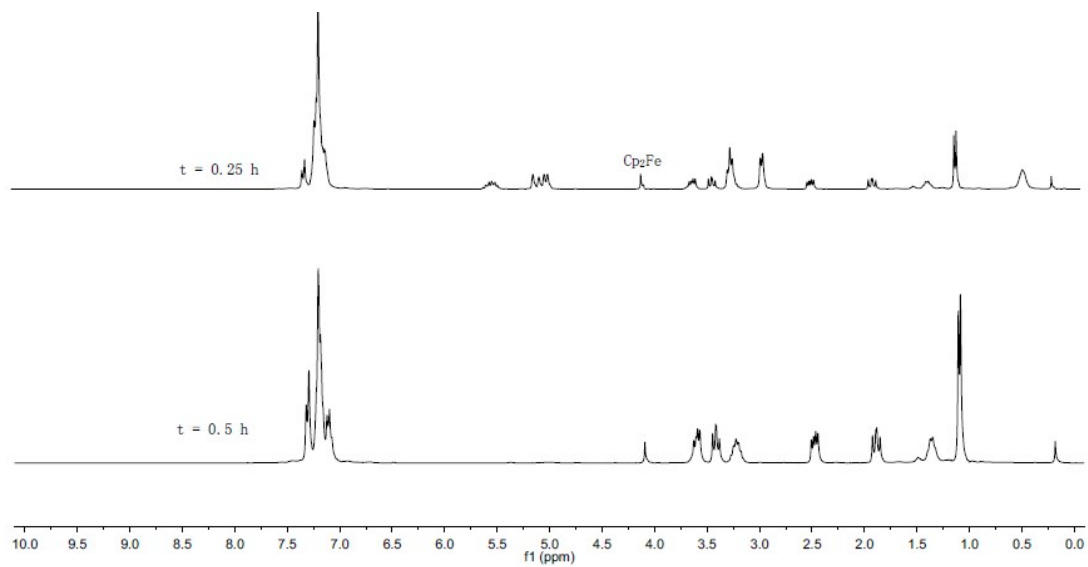

Table 5, Entry 2 <sup>1</sup>H NMR, 300 M, C<sub>6</sub>D<sub>6</sub>, ferrocene as internal standard  
Substrate: 15b (0.32 mmol), Catalyst: 8 (2.0 % mol),  
Temperature: 25 °C

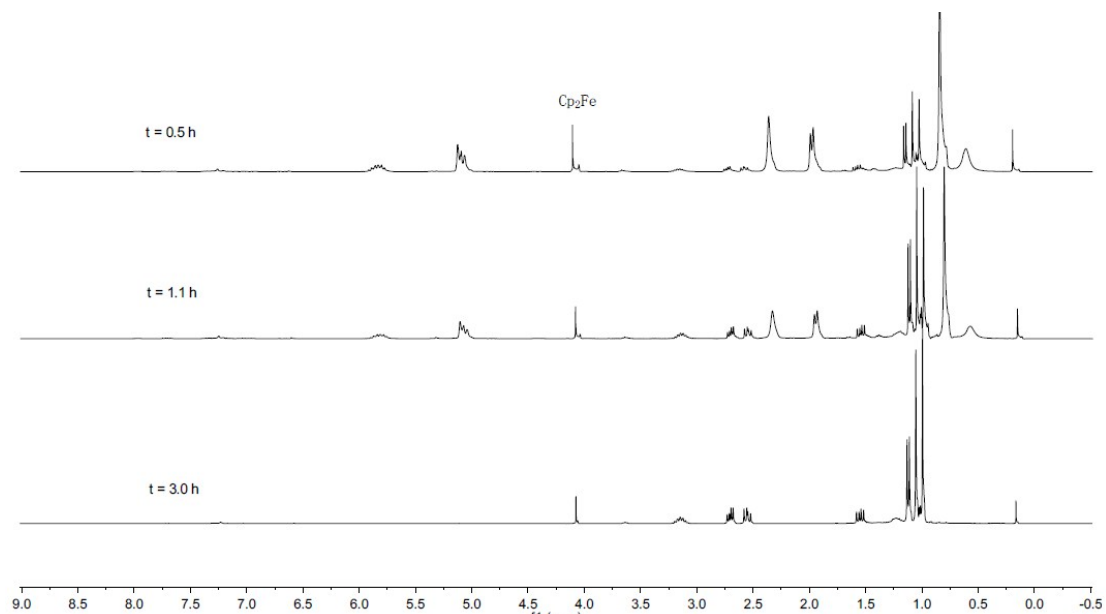

Table 5, Entry 3  $^1\text{H}$  NMR, 300 M,  $\text{C}_6\text{D}_6$ , ferrocene as internal standard  
Substrate: 15c (0.32 mmol), Catalyst: **8** (2.0 % mol), Temperature: 25 °C

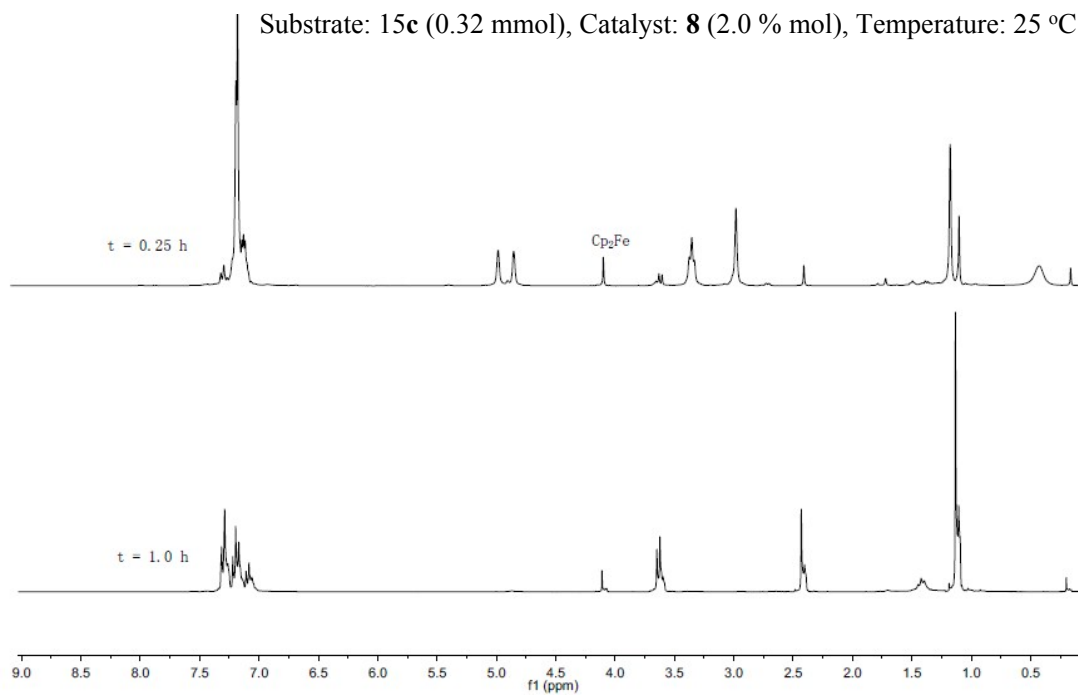

Table 5, Entry 4  $^1\text{H}$  NMR, 300 M,  $\text{C}_6\text{D}_6$ , ferrocene as internal standard  
Substrate: 15d (0.32 mmol), Catalyst: **8** (2.0 % mol),  
Temperature: 50 °C

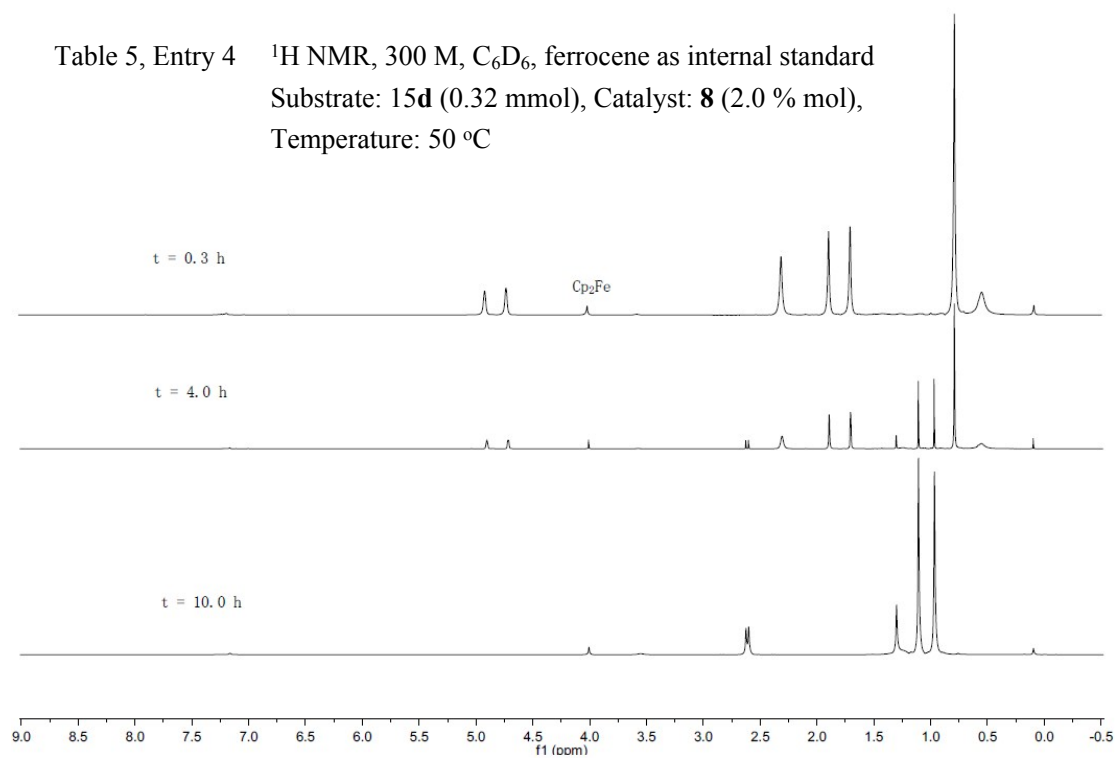

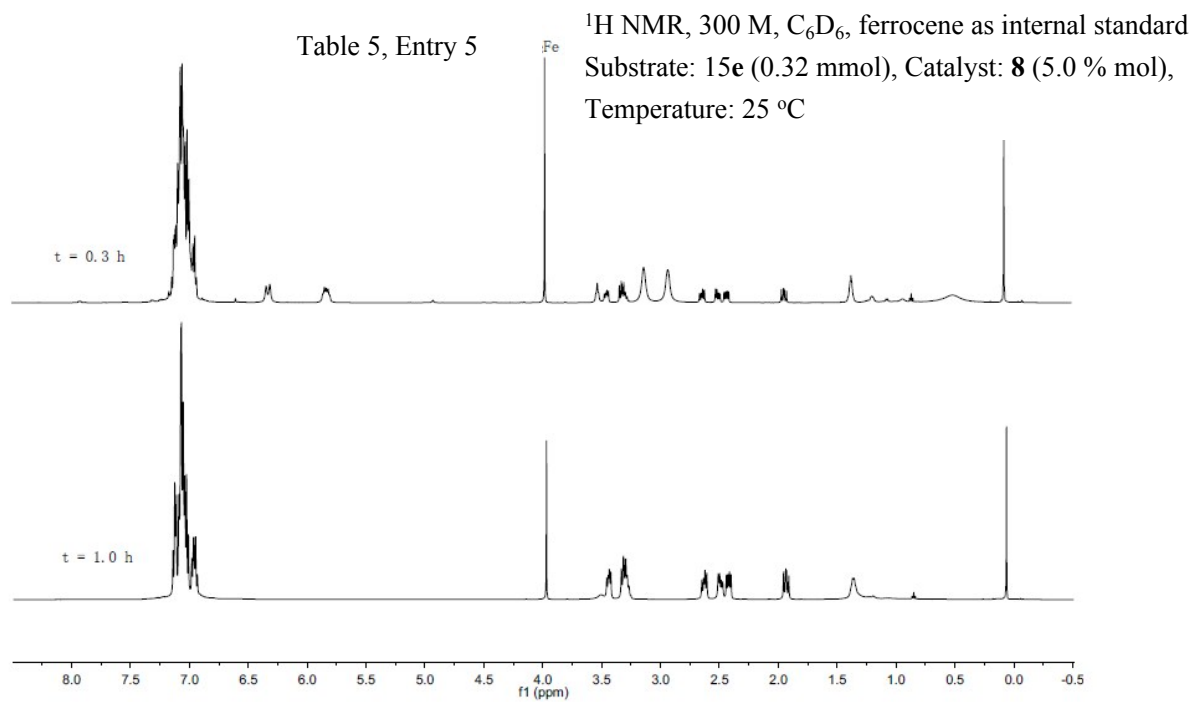

Table 5, Entry 6

$^1\text{H}$  NMR, 300 M,  $\text{C}_6\text{D}_6$ , ferrocene as internal standard  
 Substrate: 15f (0.32 mmol), Catalyst: **8** (5.0 % mol),  
 Temperature: 50 °C

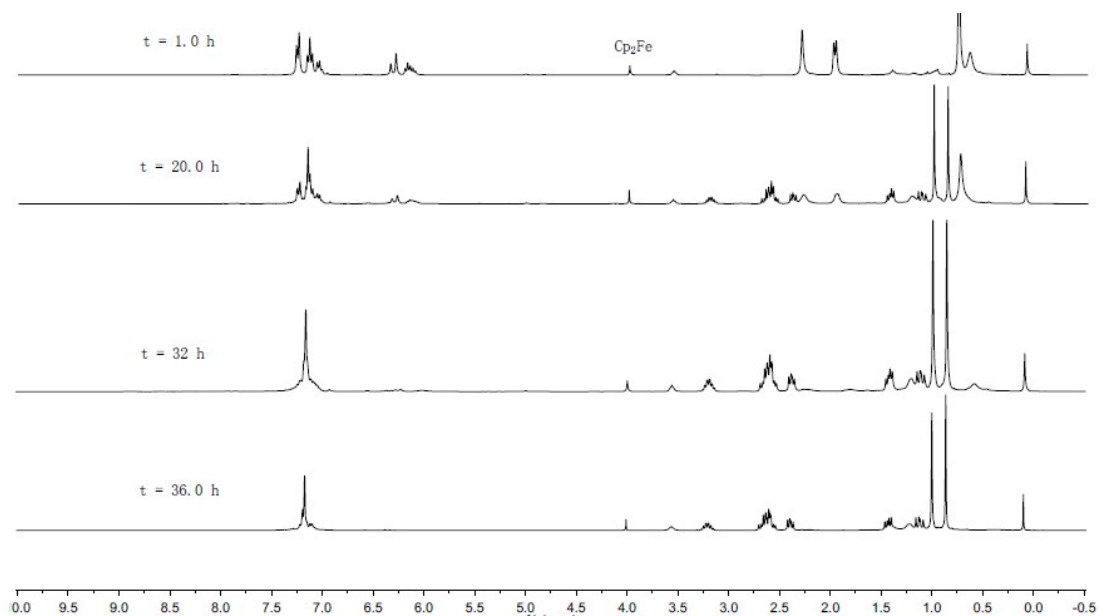

Table 5, Entry 7

$^1\text{H NMR}$ , 300 M,  $\text{C}_6\text{D}_6$ , ferrocene as internal standard

Substrate: 15g (0.32 mmol), Catalyst: **8** (4.0 % mol), Temperature: 50 °C

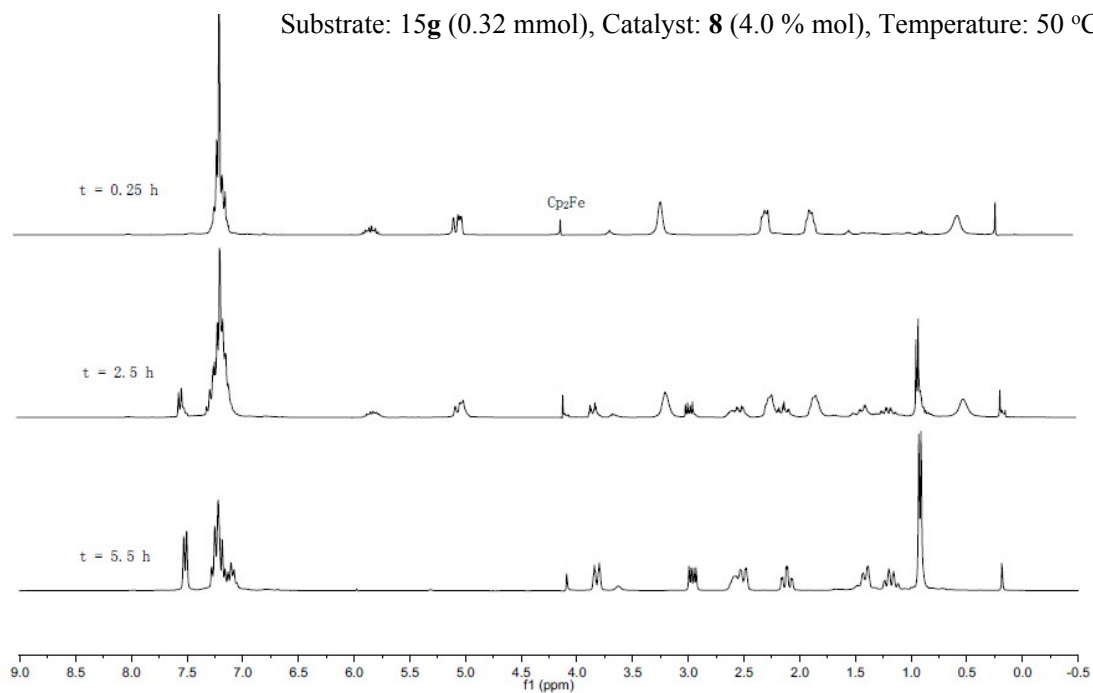

Table 5, Entry 8

$^1\text{H NMR}$ , 300 M,  $\text{C}_6\text{D}_6$ , ferrocene as internal standard

Substrate: 15h (0.32 mmol), Catalyst: **8** (4.0 % mol),

Temperature: 50 °C

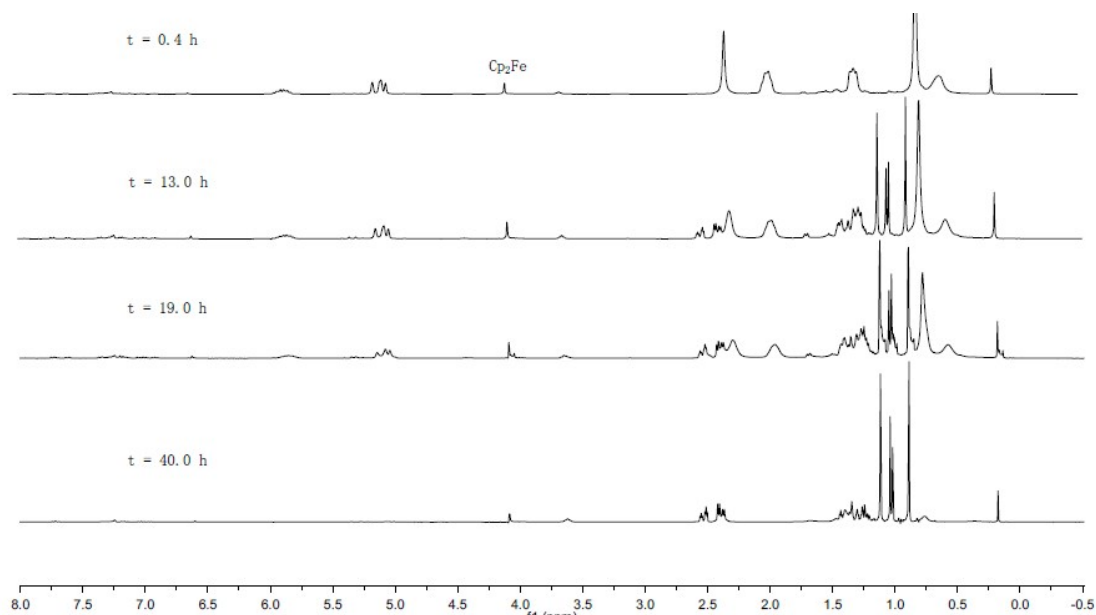

Table 5, Entry 9  $^1\text{H}$  NMR, 300 M,  $\text{C}_6\text{D}_6$ , ferrocene as internal standard  
Substrate: **15i** (0.32 mmol), Catalyst: **8** (5.0 % mol),  
Temperature: 60 °C

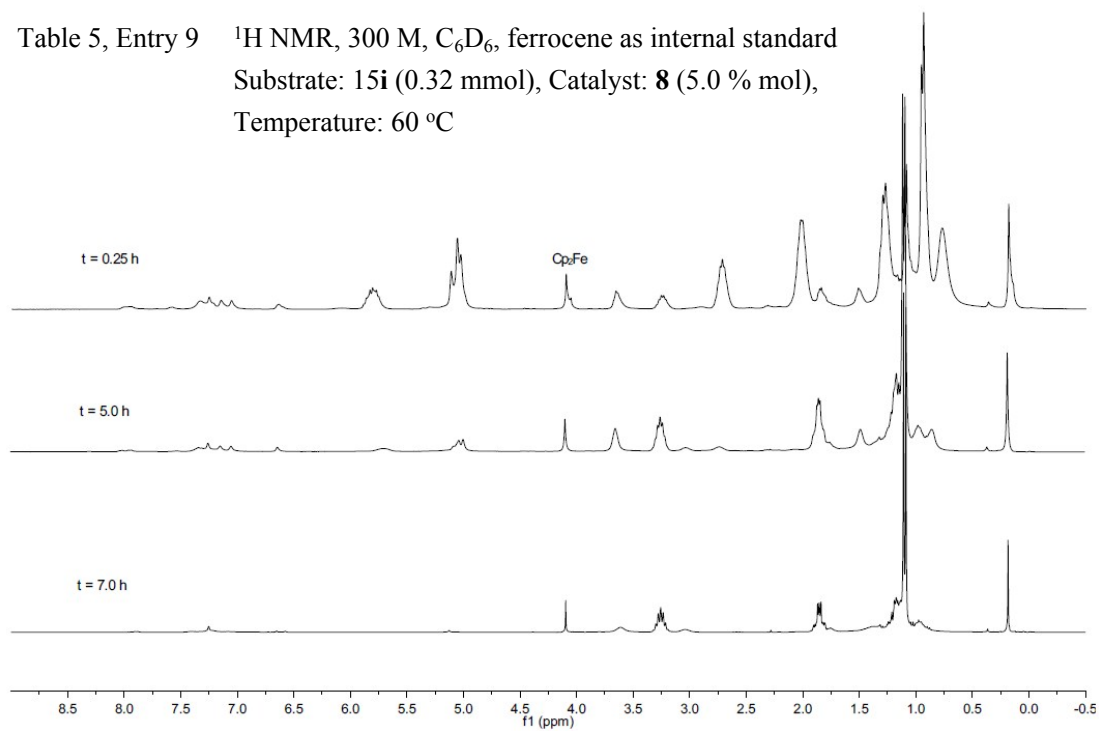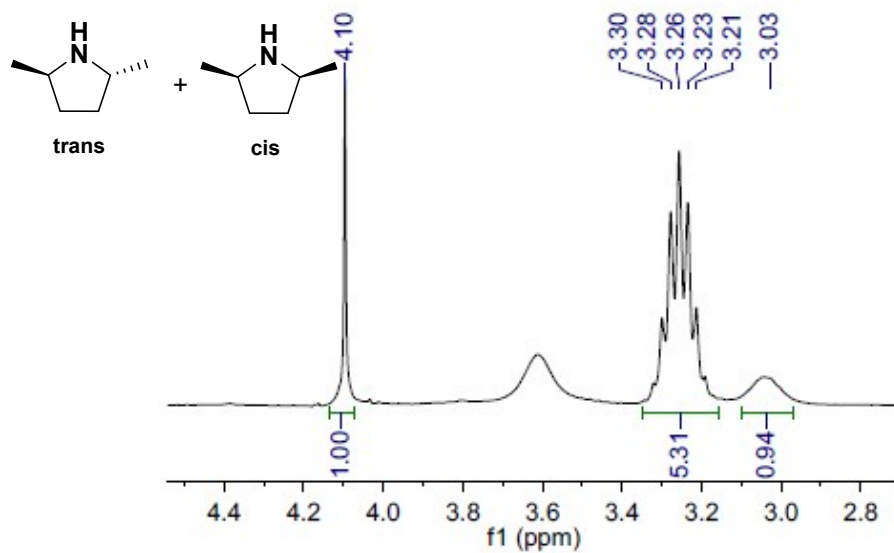

# NMR Spectra of Isolated 16a, 16c, 16e, 16g.

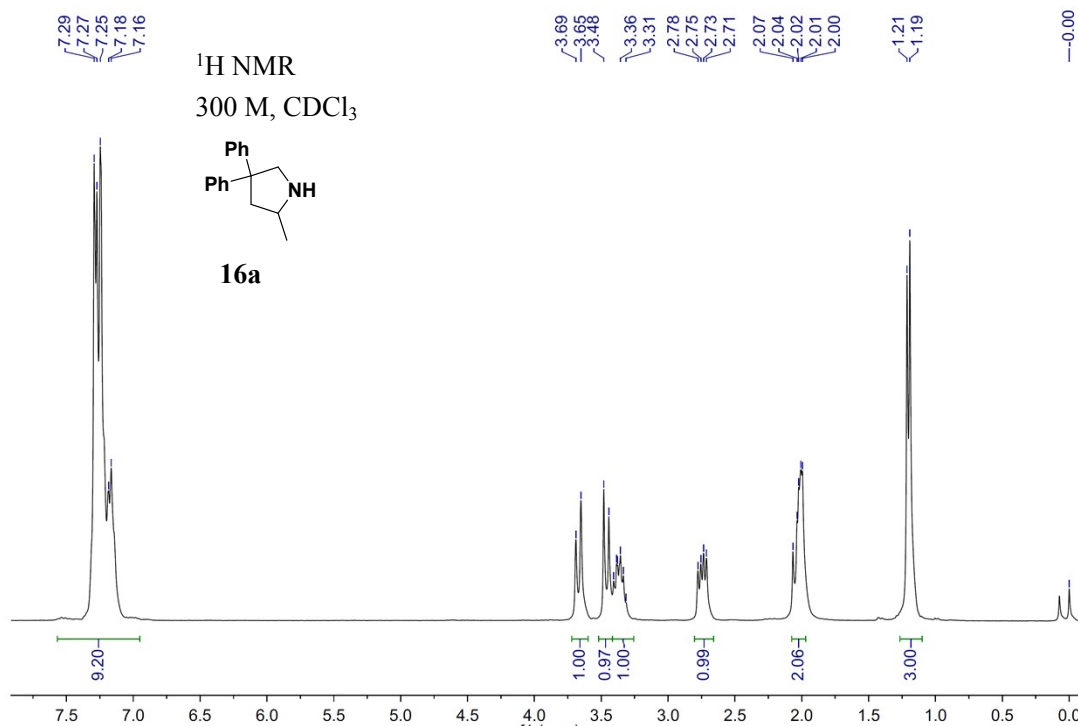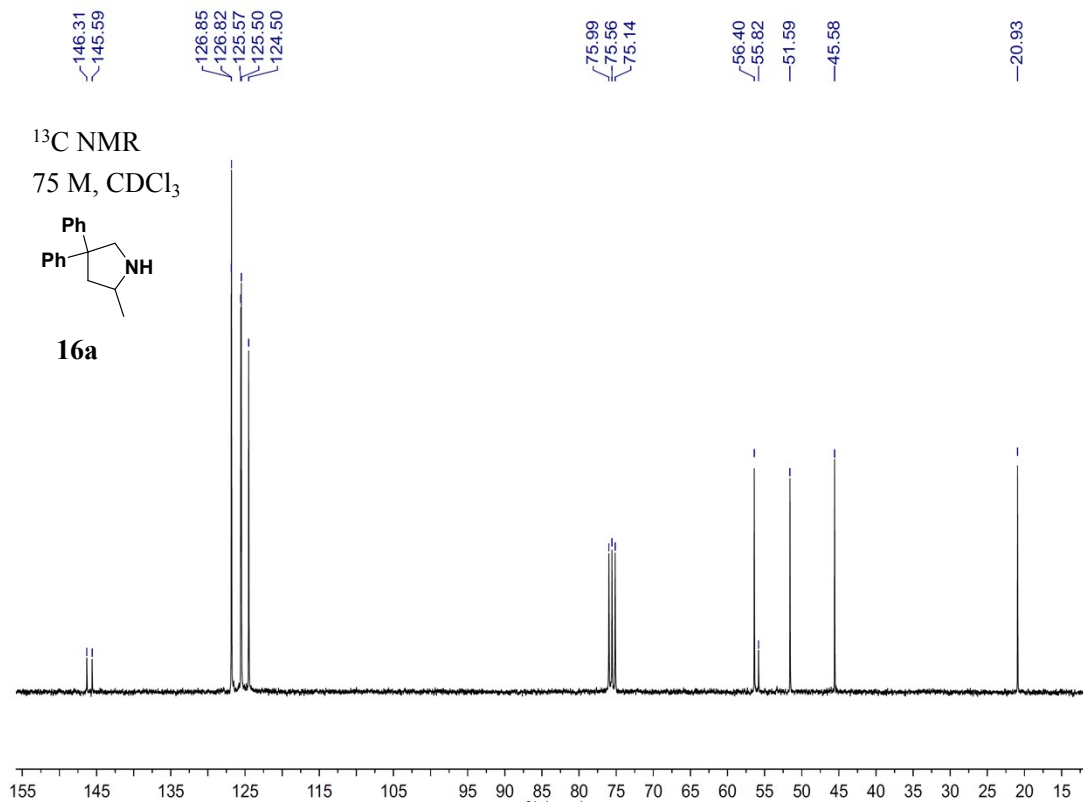

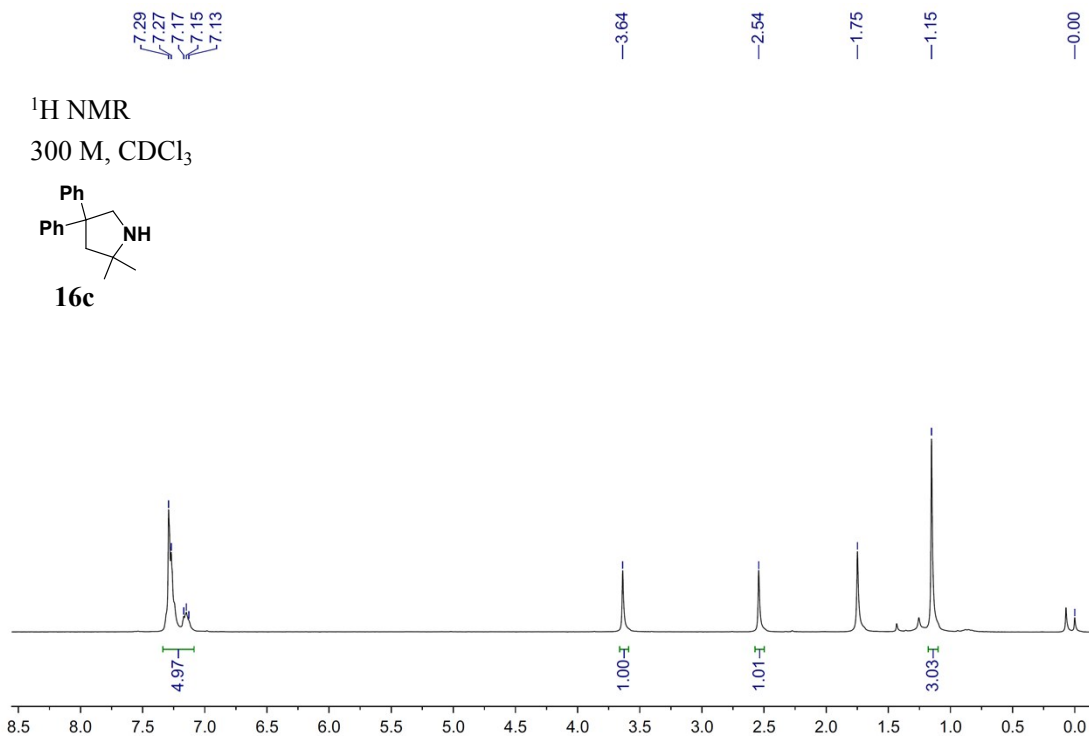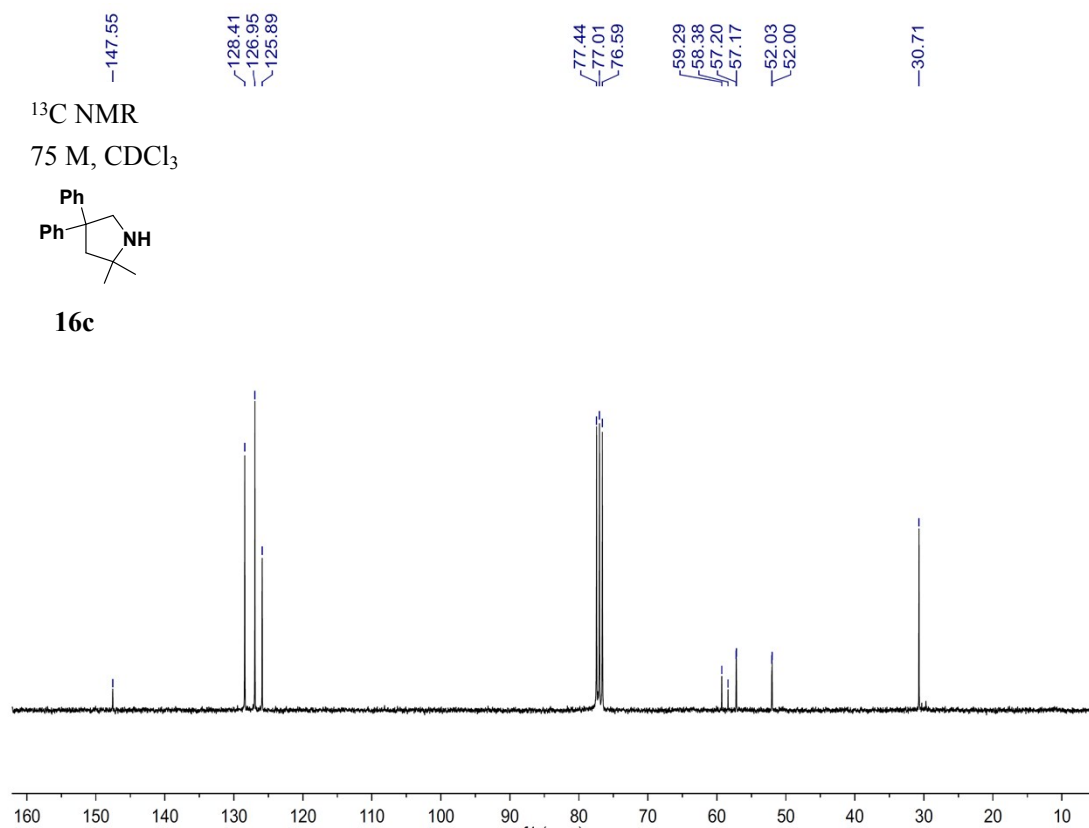



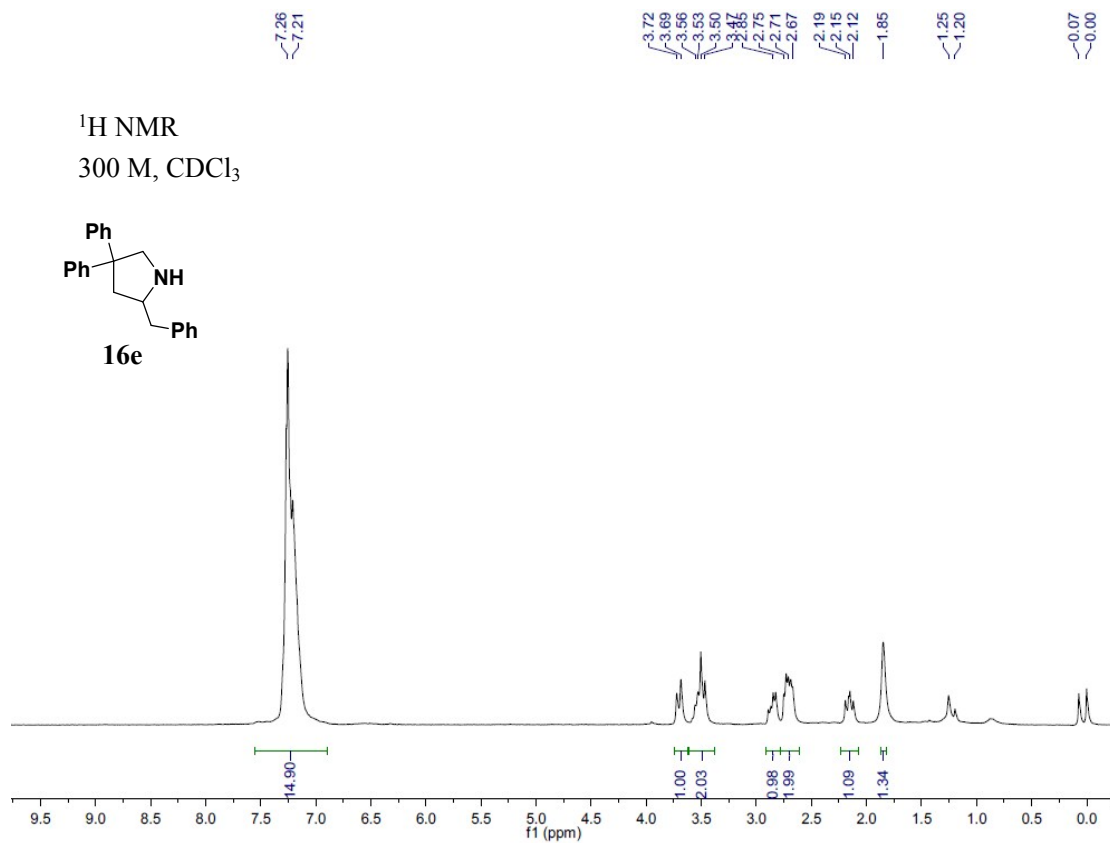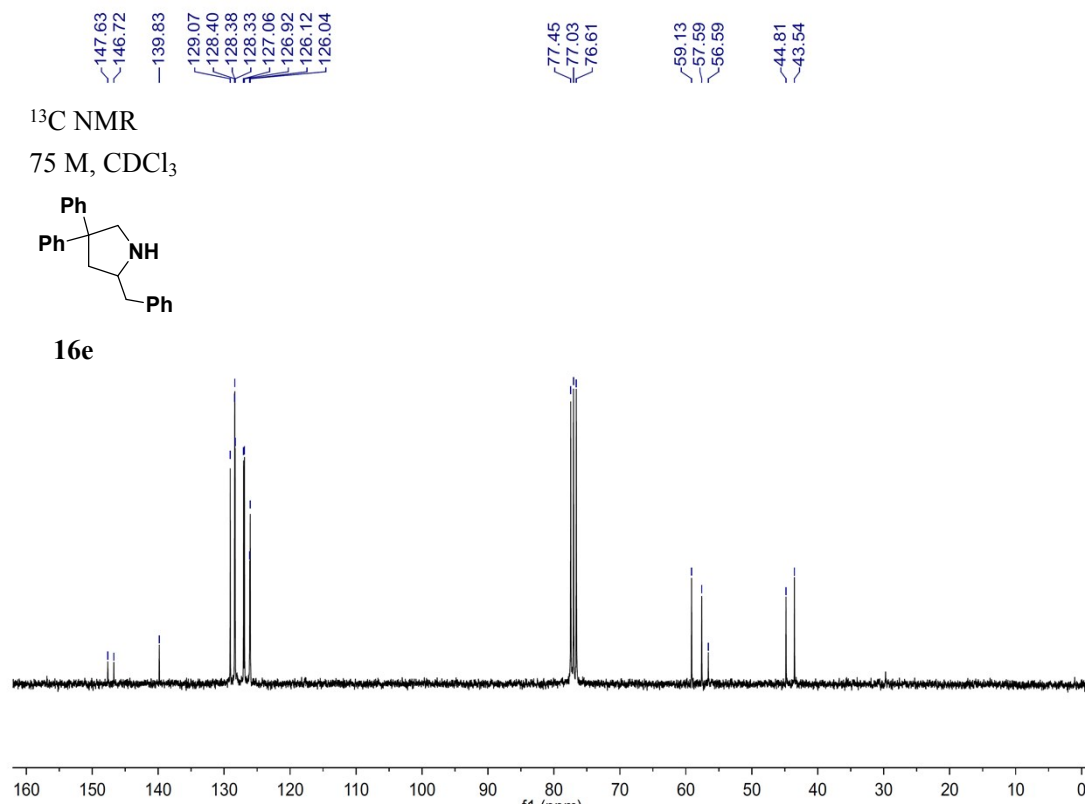

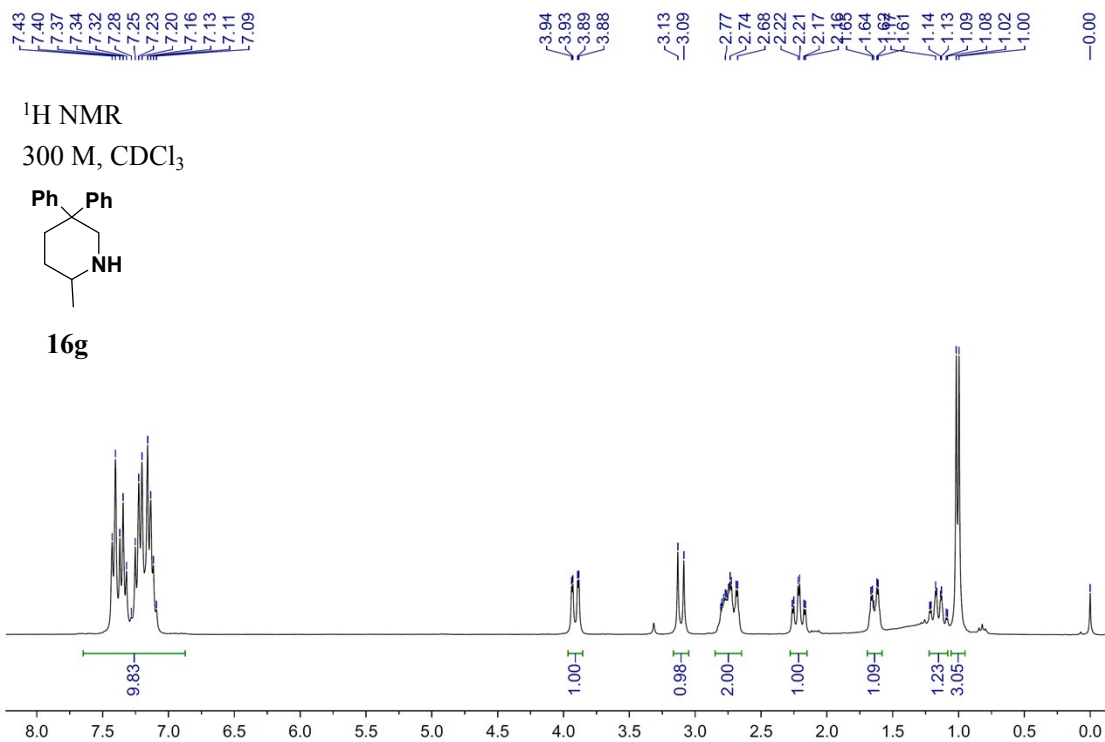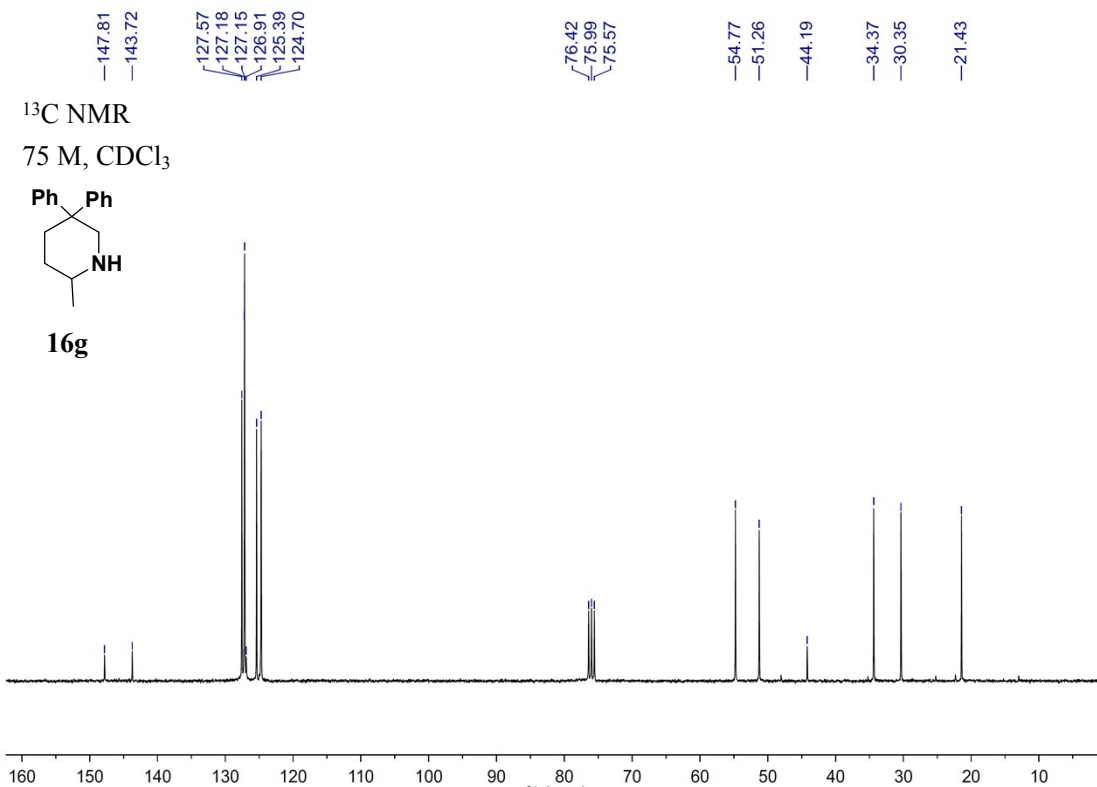

**Molecular Structures and Selected Bond Distances and Angles of the Complexes  
4–6, 8–14.**

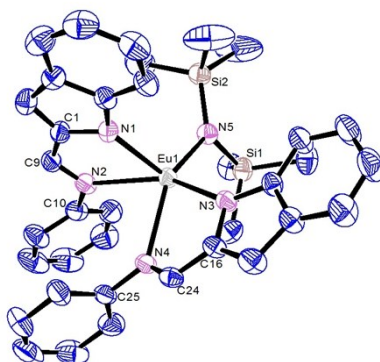

**Figure S1.** Structure of complex **4** (Ellipsoids at 30% probability level). Hydrogen atoms were omitted for clarity. Selected bond distances (Å) and angles (°): Eu1-N1 2.341(3), Eu1-N2 2.525(3), Eu1-N3 2.363(3), Eu1-N4 2.517(3), Eu1-N5 2.236(3), C9-N2 1.288(5), C24-N4 1.292(5), N2-C9-C1 121.5(4), C9-N2-C10 122.0(4), N4-C24-C16 121.5(3), C24-N4-C25 117.9(3), N5-Eu1-N1 113.03(11), N5-Eu1-N3 107.59(11), N1-Eu1-N3 100.43(11), N5-Eu1-N4 148.59(11), N1-Eu1-N4 97.92(10), N3-Eu1-N4 70.09(10), N5-Eu1-N2 102.36(11), N1-Eu1-N2 69.35(11), N3-Eu1-N2 149.95(11), N4-Eu1-N2 83.08(10).

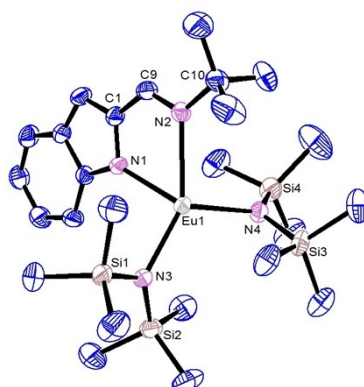

**Figure S2.** Structure of complex **5** (Ellipsoids at 30% probability level). Hydrogen atoms were omitted for clarity. Selected bond distances (Å) and angles (°): Eu1-N1 2.351(2), Eu1-N2 2.565(2), Eu1-N3 2.251(2), Eu1-N4 2.254(2), C9-N2 1.279(3), N3-Eu1-N4 115.40(9), N3-Eu1-N1 97.65(8), N4-Eu1-N1 125.38(8), N3-Eu1-N2 140.88(8), N4-Eu1-N2 100.93(8), N1-Eu1-N2 70.45(7), N2-C9-C1 123.3(3), C9-N2-C10 119.6(2).

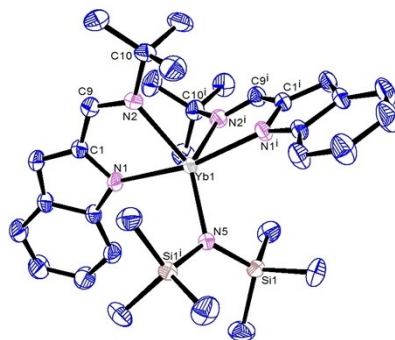

**Figure S3.** Structure of complex **6** (Ellipsoids at 30% probability level). Hydrogen atoms were omitted for clarity. Selected bond distances (Å) and angles (°): N1-Yb1 2.2740(16), N2-Yb1 2.4458(16), N5-Yb1 2.165(2), Yb1-N1<sup>#1</sup> 2.2740(16), Yb1-N2<sup>#1</sup> 2.4458(16), C9-N2 1.288(3), N5-Yb1-N1 96.53(4), N5-Yb1-N1<sup>#1</sup> 96.53(4), N1-Yb1-N1<sup>#1</sup> 166.94(8), N5-Yb1-N2 132.31(4), N1-Yb1-N2 72.94(6), N1<sup>#1</sup>-Yb1-N2 98.06(6), N5-Yb1-N2<sup>#1</sup> 132.31(4), N1-Yb1-N2<sup>#1</sup> 98.06(6), N1<sup>#1</sup>-Yb1-N2<sup>#1</sup> 72.94(6), N2-Yb1-N2<sup>#1</sup> 95.39(8), N2-C9-C1 122.08(18), C9-N2-C10 120.10(17).

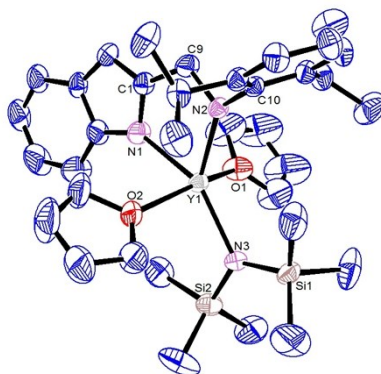

**Figure S4.** Structure of complex **8** (Ellipsoids at 30% probability level). Hydrogen atoms were omitted for clarity. Selected bond distances (Å) and angles (°): Y1-N1 2.294(3), Y1-N2 2.182(2), Y1-N3 2.275(2), Y1-O1 2.361(2), Y1-O2 2.357(2), C9-N2 1.474(4), N2-Y1-N3 132.01(9), N2-Y1-N1 80.00(10), N3-Y1-N1 147.91(10), N2-Y1-O2 101.89(9), N3-Y1-O2 89.17(9), N1-Y1-O2 85.20(11), N2-Y1-O1 97.30(9), N3-Y1-O1 89.04(9), N1-Y1-O1 83.49(11), O2-Y1-O1 155.64(10), C1-N1-Y1 108.9(2), C10-N2-Y1 137.78(19), C9-N2-Y1 112.47(18), C10-N2-C9 109.7(2), N2-C9-C1 115.2(3).

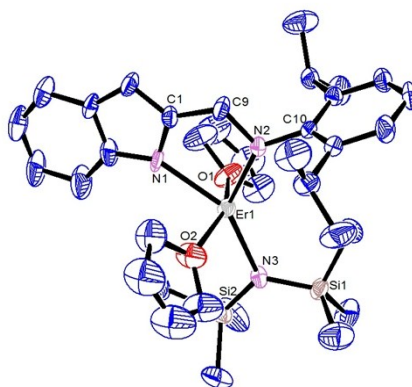

**Figure S5.** Structure of complex **9** (Ellipsoids at 30% probability level). Hydrogen atoms were omitted for clarity. Selected bond distances (Å) and angles (°): Er1-N1 2.293(12), Er1-N2 2.161(12), Er1-N3 2.257(12), Er1-O2 2.336(13), Er1-O1 2.351(12), C9-N2 1.455(18), N2-Er1-N3 131.9(4), N2-Er1-N1 80.4(5), N3-Er1-N1 147.7(5), N2-Er1-O2 97.5(5), N3-Er1-O2 89.7(5), N1-Er1-O2 83.6(6), N2-Er1-O1 101.3(5), N3-Er1-O1 89.2(4), N1-Er1-O1 84.5(5), O2-Er1-O1 155.7(6), C10-N2-C9 108.7(11), N2-C9-C1 112.3(13).

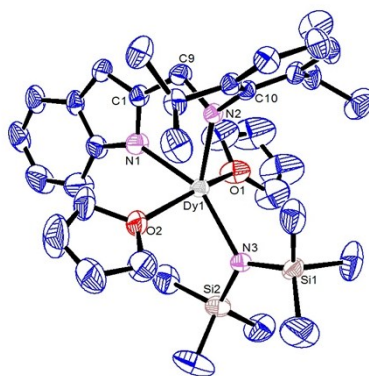

**Figure S6.** Structure of complex **10** (Ellipsoids at 30% probability level). Hydrogen atoms were omitted for clarity. Selected bond distances (Å) and angles (°): Dy1-N1 2.316(4), Dy1-N2 2.190(3), Dy1-N3 2.300(4), Dy1-O1 2.378(4), Dy1-O2 2.387(4), N2-C9 1.467(5), N2-Dy1-N3 134.11(12), N2-Dy1-N1 78.82(14), N3-Dy1-N1 146.97(13), N2-Dy1-O2 102.13(14), N3-Dy1-O2 89.21(13), N1-Dy1-O2 84.69(17), N2-Dy1-O(1) 97.08(13), N3-Dy1-O1 89.09(13), N1-Dy1-O1 83.10(18), O2-Dy1-O1 154.74(16), C1-N1-Dy1 109.0(3), C9-N2-Dy1 114.2(3), C10-N2-Dy1 136.1(2), C10-N2-C9 109.6(3), N2-C9-C1 113.9(4).

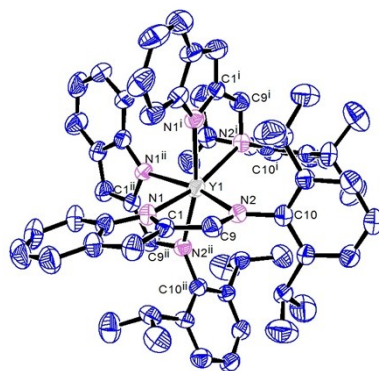

**Figure S7.** Structure of complex **11** (Ellipsoids at 30% probability level). Hydrogen atoms were omitted for clarity. Selected bond distances (Å) and angles (°): N1-Y1 2.356(2), Y1-N1<sup>#1</sup> 2.356(2), Y1-N1<sup>#2</sup> 2.356(2), N2-Y1 2.496(2), Y1-N2<sup>#1</sup> 2.496(2), Y1-N2<sup>#2</sup> 2.496(2), C9-N2 1.363(3), N2-C9-C1 119.0(2), C9-N2-C10 112.1(2), N1-Y1-N1<sup>#1</sup> 92.24(7), N1-Y1-N1<sup>#2</sup> 92.24(7), N1<sup>#1</sup>-Y1-N1<sup>#2</sup> 92.25(7), N1-Y1-N2 71.19(7), N1<sup>#1</sup>-Y1-N2 89.01(6), N1<sup>#2</sup>-Y1-N2 163.42(7), N1-Y1-N2<sup>#2</sup> 89.01(6), N1<sup>#1</sup>-Y1-N2<sup>#2</sup> 163.43(7), N1<sup>#2</sup>-Y1-N2<sup>#2</sup> 71.19(7), N2-Y1-N2<sup>#2</sup> 107.00(5), N1-Y1-N2<sup>#1</sup>, 163.43(7), N1<sup>#1</sup>-Y1-N2<sup>#1</sup> 71.19(7), N1<sup>#2</sup>-Y1-N2<sup>#1</sup> 89.01(6), N2-Y1-N2<sup>#1</sup> 107.00(5), N2<sup>#2</sup>-Y1-N2<sup>#1</sup> 107.00(5).

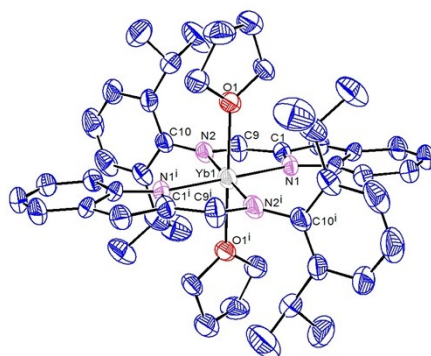

**Figure S8.** Structure of complex **12** (Ellipsoids at 30% probability level). Hydrogen atoms were omitted for clarity. Selected bond distances (Å) and angles (°): N1-Yb1 2.271(5), Yb1-N1<sup>#1</sup> 2.271(5), Yb1-N2 2.420(7), Yb1-N2<sup>#1</sup> 2.420(7), O1-Yb1 2.297(5), Yb1-O1<sup>#1</sup> 2.297(5), N1<sup>#1</sup>-Yb1-N1 180.0, N1<sup>#1</sup>-Yb1-O1 90.01(18), N1-Yb1-O1 89.99(18), N1<sup>#1</sup>-Yb1-O1<sup>#1</sup> 89.99(18), N1-Yb1-O1<sup>#1</sup> 90.01(18), O1-Yb1-O1<sup>#1</sup> 179.998(1), N1<sup>#1</sup>-Yb1-N2<sup>#1</sup> 74.02(18), N1-Yb1-N2<sup>#1</sup> 105.99(18), O1-Yb1-N2<sup>#1</sup> 89.44(18), O1<sup>#1</sup>-Yb1-N2<sup>#1</sup> 90.56(18), N1<sup>#1</sup>-Yb1-N2 105.98(18), N1-Yb1-N2

74.02(18), O1-Yb1-N2 90.56(18), O1<sup>#1</sup>-Yb1-N2 89.44(18), N2<sup>#1</sup>-Yb1-N2 179.999(2), N2-C9-C1 118.7(7), C9-N2-C10 111.6(6).

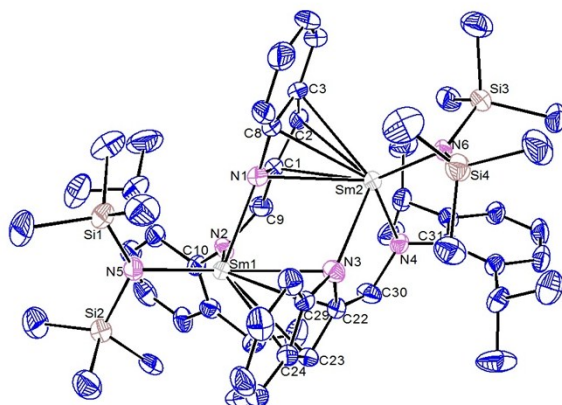

**Figure S9.** Structure of complex **13** (Ellipsoids at 30% probability level). Hydrogen atoms were omitted for clarity. Selected bond distances (Å) and angles (°): N1-Sm1 2.444(8), Sm1-N2 2.238(9), Sm1-N5 2.276(8), Sm1-N3 2.813(9), Sm1-C22 2.949(10), Sm1-C23 2.957(10), Sm1-C24 2.873(10), Sm1-C29 2.780(10), N2-C9 1.487(14), Sm2-N3 2.447(8), Sm2-N4 2.216(8), Sm2-N6 2.266(8), N1-Sm2 2.804(9), C1-Sm2 2.933(11), C2-Sm2 2.980(10), Sm2-C3 2.889(10), Sm2-C8 2.772(10), N4-C30 1.464(13), N2-Sm1-N5 114.1(3), N2-Sm1-N1 73.5(3), N5-Sm1-N1 109.4(3), N2-Sm1-N3 106.8(3), N5-Sm1-N3 137.5(3), N1-Sm1-N3 71.5(3), C10-N2-C9 111.9(9), N2-C9-C1 113.7(9), N4-Sm2-N6 112.5(3), N4-Sm2-N3 71.8(3), N6-Sm2-N3 110.9(3), N4-Sm2-N1 106.5(3), N6-Sm2-N1 139.6(3), N3-Sm2-N1 71.6(3), C31-N4-C30 114.4(8), N4-C30-C22 112.1(9), Sm2-N3-Sm1 107.3(3), Sm1-N1-Sm2 107.7(3).

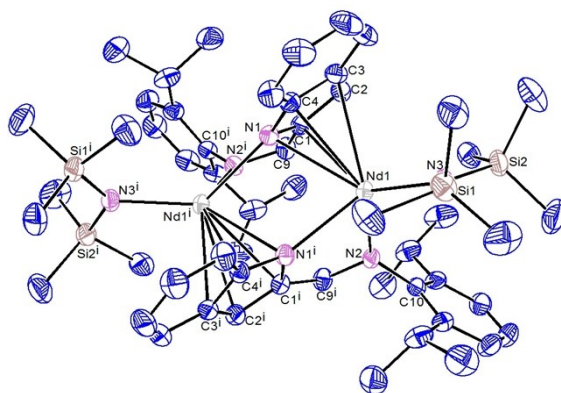

**Figure S10.** Structure of complex **14** (Ellipsoids at 30% probability level). Hydrogen atoms were omitted for clarity. Selected bond distances (Å) and angles (°): N1-Nd1<sup>#1</sup>

2.519(2), N1-Nd1 2.802(2), Nd1-N1<sup>#1</sup> 2.519(2), Nd1-N2 2.263(2), Nd1-N3 2.292(2), C1-Nd1 2.855(3), Nd1-C2 2.924(3), Nd1-C3 2.963(3), Nd1-C4 2.867(3), N2-C9<sup>#1</sup> 1.463(4), C9-N2<sup>#1</sup> 1.463(4), Nd1<sup>#1</sup>-N1-Nd1 106.99(8), N2-Nd1-N3 112.13(9), N2-Nd1-N1<sup>#1</sup> 69.91(8), N3-Nd1-N1<sup>#1</sup> 129.81(8), N2-Nd1-N1 109.43(7), N3-Nd1-N1 138.13(8), N1<sup>#1</sup>-Nd1-N1 70.20(9), C10-N2-C9<sup>#1</sup> 114.5(2), N2<sup>#1</sup>-C9-C1 111.5(2).

**Table S1.** Crystallographic Data for 4–6, 11, 12.

|                                         | 4                                                                 | 5                                                                 | 6                                                                 | 11                                               | 12                                                               |
|-----------------------------------------|-------------------------------------------------------------------|-------------------------------------------------------------------|-------------------------------------------------------------------|--------------------------------------------------|------------------------------------------------------------------|
| formula                                 | C <sub>36</sub> H <sub>40</sub> N <sub>5</sub> Si <sub>2</sub> Eu | C <sub>25</sub> H <sub>51</sub> N <sub>4</sub> Si <sub>4</sub> Eu | C <sub>32</sub> H <sub>48</sub> N <sub>5</sub> Si <sub>2</sub> Yb | C <sub>63</sub> H <sub>69</sub> N <sub>6</sub> Y | C <sub>50</sub> H <sub>62</sub> N <sub>4</sub> O <sub>2</sub> Yb |
| Fw                                      | 750.87                                                            | 672.02                                                            | 731.97                                                            | 999.15                                           | 924.08                                                           |
| T(K)                                    | 293(2)                                                            | 293(2)                                                            | 293(2)                                                            | 293(2)                                           | 293(2)                                                           |
| $\lambda$ (Å)                           | 0.71073                                                           | 0.71073                                                           | 0.71073                                                           | 0.71073                                          | 0.71073                                                          |
| crystal system                          | Triclinic                                                         | Monoclinic                                                        | Monoclinic                                                        | Rhombohedral                                     | Triclinic                                                        |
| space group                             | <i>P</i> -1                                                       | <i>P</i> <sub>2</sub> / <i>c</i>                                  | <i>Cc</i>                                                         | <i>R</i> -3                                      | <i>P</i> -1                                                      |
| <i>a</i> (Å)                            | 12.5496(8)                                                        | 18.2694(9)                                                        | 15.4846(8)                                                        | 18.6067(12)                                      | 10.244(2)                                                        |
| <i>b</i> (Å)                            | 12.7106(8)                                                        | 11.7290(6)                                                        | 15.5616(9)                                                        | 18.6067(12)                                      | 10.812(2)                                                        |
| <i>c</i> (Å)                            | 13.0429(8)                                                        | 17.2018(9)                                                        | 15.9167(9)                                                        | 36.828(2)                                        | 12.997(3)                                                        |
| $\alpha$ (deg)                          | 91.9700(10)                                                       | 90                                                                | 90                                                                | 90                                               | 69.120(3)                                                        |
| $\beta$ (deg)                           | 98.0050(10)                                                       | 108.6700(10)                                                      | 111.3640(10)                                                      | 90                                               | 72.005(3)                                                        |
| $\gamma$ (deg)                          | 116.3170(10)                                                      | 90                                                                | 90                                                                | 120                                              | 86.183(3)                                                        |
| <i>V</i> (Å <sup>3</sup> )              | 1835.8(2)                                                         | 3492.1(3)                                                         | 3571.8(3)                                                         | 11042.0(12)                                      | 1277.7(5)                                                        |
| <i>Z</i>                                | 2                                                                 | 4                                                                 | 4                                                                 | 6                                                | 1                                                                |
| D <sub>calcd</sub> (mg/m <sup>3</sup> ) | 1.358                                                             | 1.278                                                             | 1.361                                                             | 0.902                                            | 1.201                                                            |
| $\mu$ (mm <sup>-1</sup> )               | 1.804                                                             | 1.952                                                             | 2.712                                                             | 0.825                                            | 1.867                                                            |
| <i>F</i> (000)                          | 764                                                               | 1392                                                              | 1492                                                              | 3168                                             | 476                                                              |
| $\theta$ range (deg)                    | 1.80–27.60                                                        | 2.10–27.57                                                        | 1.93–27.59                                                        | 1.66–27.63                                       | 1.76–27.44                                                       |
| reflections                             |                                                                   |                                                                   |                                                                   |                                                  |                                                                  |
| collected                               | 16050/8309                                                        | 29837/8056                                                        | 15241/4127                                                        | 32154/5696                                       | 5676/5676                                                        |
| / unique                                |                                                                   |                                                                   |                                                                   |                                                  |                                                                  |



|                                                             |                      |                      |                      |                      |                      |
|-------------------------------------------------------------|----------------------|----------------------|----------------------|----------------------|----------------------|
| $R(\text{int})$                                             | 0.0295               | 0.0339               | 0.0194               | 0.0695               | 0.0000               |
| goodness-of-fit<br>on $F^2$                                 | 0.999                | 1.068                | 1.028                | 1.061                | 1.067                |
| $R_I, wR_2 [I > 2\sigma(I)]$                                | 0.0381,              | 0.0308,              | 0.0171,              | 0.0655,              | 0.0661,0             |
| $R_I, wR_2(\text{all data})$                                | 0.0666,              | 0.0515,              | 0.0187,              | 0.1446,              | 0.1035,              |
| Largest diff.<br>peak<br>and hole (e<br>$\text{\AA}^{-3}$ ) | 0.550 and –<br>0.647 | 0.543 and –<br>0.441 | 0.484 and –<br>0.537 | 0.353 and –<br>0.210 | 1.260 and –<br>1.640 |

**Table S2.** Crystallographic Data for **8–10, 13, 14.**

|                                    | <b>8</b>                                                            | <b>9</b>                                                             | <b>10</b>                                                            | <b>13</b>                                                    | <b>14</b>                                                    |
|------------------------------------|---------------------------------------------------------------------|----------------------------------------------------------------------|----------------------------------------------------------------------|--------------------------------------------------------------|--------------------------------------------------------------|
| formula                            | $\text{C}_{35}\text{H}_{58}\text{N}_3\text{O}_2\text{Si}_2\text{Y}$ | $\text{C}_{35}\text{H}_{58}\text{N}_3\text{O}_2\text{Si}_2\text{Er}$ | $\text{C}_{35}\text{H}_{58}\text{N}_3\text{O}_2\text{Si}_2\text{Dy}$ | $\text{C}_{54}\text{H}_{84}\text{N}_6\text{Si}_4\text{Sm}_2$ | $\text{C}_{54}\text{H}_{84}\text{N}_6\text{Si}_4\text{Nd}_2$ |
| Fw                                 | 697.93                                                              | 776.28                                                               | 771.52                                                               | 1230.33                                                      | 1218.12                                                      |
| $T(\text{K})$                      | 293(2)                                                              | 293(2)                                                               | 293(2)                                                               | 293(2)                                                       | 293(2)                                                       |
| $\lambda (\text{\AA})$             | 0.71073                                                             | 0.71073                                                              | 0.71073                                                              | 0.71073                                                      | 0.71073                                                      |
| crystal system                     | Monoclinic                                                          | Monoclinic                                                           | Monoclinic                                                           | Triclinic                                                    | Monoclinic                                                   |
| space group                        | $P2_1/n$                                                            | $P2_1/n$                                                             | $P2_1/n$                                                             | $P-1$                                                        | $P2/c$                                                       |
| $a (\text{\AA})$                   | 10.6351(8)                                                          | 10.571(4)                                                            | 10.6543(7)                                                           | 9.814(3)                                                     | 15.9322(9)                                                   |
| $b (\text{\AA})$                   | 32.280(3)                                                           | 32.187(11)                                                           | 32.270(2)                                                            | 15.222(4)                                                    | 12.3743(7)                                                   |
| $c (\text{\AA})$                   | 11.9849(9)                                                          | 12.964(3)                                                            | 12.0034(8)                                                           | 21.286(6)                                                    | 16.8816(9)                                                   |
| $\alpha(\text{deg})$               | 90                                                                  | 90                                                                   | 90                                                                   | 73.257(3)                                                    | 90                                                           |
| $\beta(\text{deg})$                | 110.0440(10)                                                        | 120.23(2)                                                            | 110.3490(10)                                                         | 86.632(3)                                                    | 117.4350(10)                                                 |
| $\gamma(\text{deg})$               | 90                                                                  | 90                                                                   | 90                                                                   | 77.623(3)                                                    | 90                                                           |
| $V (\text{\AA}^3)$                 | 3865.3(5)                                                           | 3811(2)                                                              | 3869.4(5)                                                            | 2974.4(13)                                                   | 2953.9(3)                                                    |
| $Z$                                | 4                                                                   | 4                                                                    | 4                                                                    | 2                                                            | 4                                                            |
| $D_{\text{calcd}} (\text{mg/m}^3)$ | 1.199                                                               | 1.353                                                                | 1.324                                                                | 1.374                                                        | 1.370                                                        |

|                                 |             |             |             |             |             |
|---------------------------------|-------------|-------------|-------------|-------------|-------------|
| $\mu(\text{mm}^{-1})$           | 1.602       | 2.297       | 2.024       | 2.073       | 1.857       |
| $F(000)$                        | 1488        | 1604        | 1596        | 1260        | 1252        |
| $\theta$ range (deg)            | 1.92–27.61  | 1.93–25.00  | 2.13–27.00  | 1.49–25.00  | 1.65–27.44  |
| reflections                     |             |             |             |             |             |
| collected                       | 33292/8879  | 23852/6531  | 31980/8399  | 20155/10296 | 24812/6720  |
| / unique                        |             |             |             |             |             |
| $R(\text{int})$                 | 0.0554      | 0.0444      | 0.0238      | 0.0488      | 0.0373      |
| goodness-of-fit                 |             |             |             |             |             |
| on $F^2$                        | 1.011       | 1.094       | 1.210       | 1.066       | 1.048       |
| $R_1, wR_2 [I > 2\sigma(I)]$    | 0.0498,     | 0.0929,     | 0.0357,     | 0.0614,     | 0.0276,     |
| $R_1, wR_2(\text{all data})$    | 0.1075      | 0.2421      | 0.0783      | 0.1575      | 0.0598      |
|                                 | 0.1061,     | 0.0981,     | 0.0426,     | 0.0932,     | 0.0483,     |
|                                 | 0.1280      | 0.2450      | 0.0810      | 0.1793      | 0.0666      |
| Largest diff. peak              |             |             |             |             |             |
| and hole (e $\text{\AA}^{-3}$ ) | 0.306 and – | 1.943 and – | 0.470 and – | 2.231 and – | 0.718 and – |
|                                 | 0.462       | 4.220       | 1.288       | 2.381       | 0.388       |
